# Supplementary material for: Exploration of Bis-Cinnamido-Polyamines as Intrinsic Antimicrobial Agents and Antibiotic Enhancers
Source: MDPI journal article supplement (doi:10.3390/biom13071087), 2023-07-07
Supplement: s1 [file s1]

## Supporting Information

# Exploration of Bis-Cinnamido-Polyamines as Intrinsic Antimicrobial Agents and Antibiotic Enhancers

Melissa M. Cadelis <sup>1,2</sup>, Jisoo Kim <sup>2</sup>, Florent Rouvier <sup>3</sup>, Evangelene S. Gill <sup>2</sup>, Kyle Fraser <sup>2</sup>, Marie-Lise Bourguet-Kondracki <sup>4</sup>, Jean Michel Brunel <sup>3</sup> and Brent R. Copp <sup>2,\*</sup>

<sup>1</sup> Department of Molecular Medicine and Pathology, School of Medical Sciences, The University of Auckland, Private Bag 92019, Auckland 1142, New Zealand

<sup>2</sup> School of Chemical Sciences, The University of Auckland, Private Bag 92019, Auckland 1142, New Zealand

<sup>3</sup> Membranes et Cibles Therapeutiques (MCT), SSA, INSERM, Aix-Marseille Universite, 27 bd Jean Moulin, 13385 Marseille, France

<sup>4</sup> Laboratoire Molécules de Communication et Adaptation des Micro-Organismes, UMR 7245 CNRS, Muséum National d'Histoire Naturelle, 57 Rue Cuvier (C.P. 54), 75005 Paris, France

\* Correspondence: b.copp@auckland.ac.nz

## Contents

|                                                                                                                                                                 |            |
|-----------------------------------------------------------------------------------------------------------------------------------------------------------------|------------|
| <b>Figure S1</b> <sup>1</sup> H (CD <sub>3</sub> OD, 400 MHz) and <sup>13</sup> C (CD <sub>3</sub> OD, 100 MHz) NMR spectra for <b>13a</b>                      | <b>S3</b>  |
| <b>Figure S2</b> <sup>1</sup> H (CD <sub>3</sub> OD, 400 MHz) and <sup>13</sup> C (CD <sub>3</sub> OD, 100 MHz) NMR spectra for <b>13b</b>                      | <b>S4</b>  |
| <b>Figure S3</b> <sup>1</sup> H (CD <sub>3</sub> OD, 400 MHz) and <sup>13</sup> C (CD <sub>3</sub> OD, 100 MHz) NMR spectra for <b>13c</b>                      | <b>S5</b>  |
| <b>Figure S4</b> <sup>1</sup> H (CD <sub>3</sub> OD, 400 MHz) and <sup>13</sup> C (CD <sub>3</sub> OD, 100 MHz) NMR spectra for <b>13d</b>                      | <b>S6</b>  |
| <b>Figure S5</b> <sup>1</sup> H (CD <sub>3</sub> OD, 400 MHz) and <sup>13</sup> C (CD <sub>3</sub> OD, 100 MHz) NMR spectra for <b>13e</b>                      | <b>S7</b>  |
| <b>Figure S6</b> <sup>1</sup> H (CD <sub>3</sub> OD, 400 MHz) and <sup>13</sup> C (CD <sub>3</sub> OD, 100 MHz) NMR spectra for <b>13f</b>                      | <b>S8</b>  |
| <b>Figure S7</b> <sup>1</sup> H (DMSO- <i>d</i> <sub>6</sub> , 400 MHz) and <sup>13</sup> C (DMSO- <i>d</i> <sub>6</sub> , 100 MHz) NMR spectra for <b>14a</b>  | <b>S9</b>  |
| <b>Figure S8</b> <sup>1</sup> H (DMSO- <i>d</i> <sub>6</sub> , 400 MHz) and <sup>13</sup> C (DMSO- <i>d</i> <sub>6</sub> , 100 MHz) NMR spectra for <b>14b</b>  | <b>S10</b> |
| <b>Figure S9</b> <sup>1</sup> H (DMSO- <i>d</i> <sub>6</sub> , 400 MHz) and <sup>13</sup> C (DMSO- <i>d</i> <sub>6</sub> , 100 MHz) NMR spectra for <b>14c</b>  | <b>S11</b> |
| <b>Figure S10</b> <sup>1</sup> H (DMSO- <i>d</i> <sub>6</sub> , 400 MHz) and <sup>13</sup> C (DMSO- <i>d</i> <sub>6</sub> , 100 MHz) NMR spectra for <b>14d</b> | <b>S12</b> |
| <b>Figure S11</b> <sup>1</sup> H (DMSO- <i>d</i> <sub>6</sub> , 400 MHz) and <sup>13</sup> C (DMSO- <i>d</i> <sub>6</sub> , 100 MHz) NMR spectra for <b>14e</b> | <b>S13</b> |
| <b>Figure S12</b> <sup>1</sup> H (DMSO- <i>d</i> <sub>6</sub> , 400 MHz) and <sup>13</sup> C (DMSO- <i>d</i> <sub>6</sub> , 100 MHz) NMR spectra for <b>14f</b> | <b>S14</b> |
| <b>Figure S13</b> <sup>1</sup> H (DMSO- <i>d</i> <sub>6</sub> , 400 MHz) and <sup>13</sup> C (DMSO- <i>d</i> <sub>6</sub> , 100 MHz) NMR spectra for <b>15a</b> | <b>S15</b> |
| <b>Figure S14</b> <sup>1</sup> H (DMSO- <i>d</i> <sub>6</sub> , 400 MHz) and <sup>13</sup> C (DMSO- <i>d</i> <sub>6</sub> , 100 MHz) NMR spectra for <b>15b</b> | <b>S16</b> |
| <b>Figure S15</b> <sup>1</sup> H (DMSO- <i>d</i> <sub>6</sub> , 400 MHz) and <sup>13</sup> C (DMSO- <i>d</i> <sub>6</sub> , 100 MHz) NMR spectra for <b>15c</b> | <b>S17</b> |
| <b>Figure S16</b> <sup>1</sup> H (DMSO- <i>d</i> <sub>6</sub> , 400 MHz) and <sup>13</sup> C (DMSO- <i>d</i> <sub>6</sub> , 100 MHz) NMR spectra for <b>15d</b> | <b>S18</b> |
| <b>Figure S17</b> <sup>1</sup> H (DMSO- <i>d</i> <sub>6</sub> , 400 MHz) and <sup>13</sup> C (DMSO- <i>d</i> <sub>6</sub> , 100 MHz) NMR spectra for <b>15e</b> | <b>S19</b> |
| <b>Figure S18</b> <sup>1</sup> H (DMSO- <i>d</i> <sub>6</sub> , 400 MHz) and <sup>13</sup> C (DMSO- <i>d</i> <sub>6</sub> , 100 MHz) NMR spectra for <b>15f</b> | <b>S20</b> |
| <b>Figure S19</b> <sup>1</sup> H (DMSO- <i>d</i> <sub>6</sub> , 400 MHz) and <sup>13</sup> C (DMSO- <i>d</i> <sub>6</sub> , 100 MHz) NMR spectra for <b>16a</b> | <b>S21</b> |

|                                                                                                                               |            |
|-------------------------------------------------------------------------------------------------------------------------------|------------|
| <b>Figure S20</b> $^1\text{H}$ (DMSO- $d_6$ , 400 MHz) and $^{13}\text{C}$ (DMSO- $d_6$ , 100 MHz) NMR spectra for <b>16b</b> | <b>S22</b> |
| <b>Figure S21</b> $^1\text{H}$ (DMSO- $d_6$ , 400 MHz) and $^{13}\text{C}$ (DMSO- $d_6$ , 100 MHz) NMR spectra for <b>16c</b> | <b>S23</b> |
| <b>Figure S22</b> $^1\text{H}$ (DMSO- $d_6$ , 400 MHz) and $^{13}\text{C}$ (DMSO- $d_6$ , 100 MHz) NMR spectra for <b>16d</b> | <b>S24</b> |
| <b>Figure S23</b> $^1\text{H}$ (DMSO- $d_6$ , 400 MHz) and $^{13}\text{C}$ (DMSO- $d_6$ , 100 MHz) NMR spectra for <b>16e</b> | <b>S25</b> |
| <b>Figure S24</b> $^1\text{H}$ (DMSO- $d_6$ , 400 MHz) and $^{13}\text{C}$ (DMSO- $d_6$ , 100 MHz) NMR spectra for <b>16f</b> | <b>S26</b> |

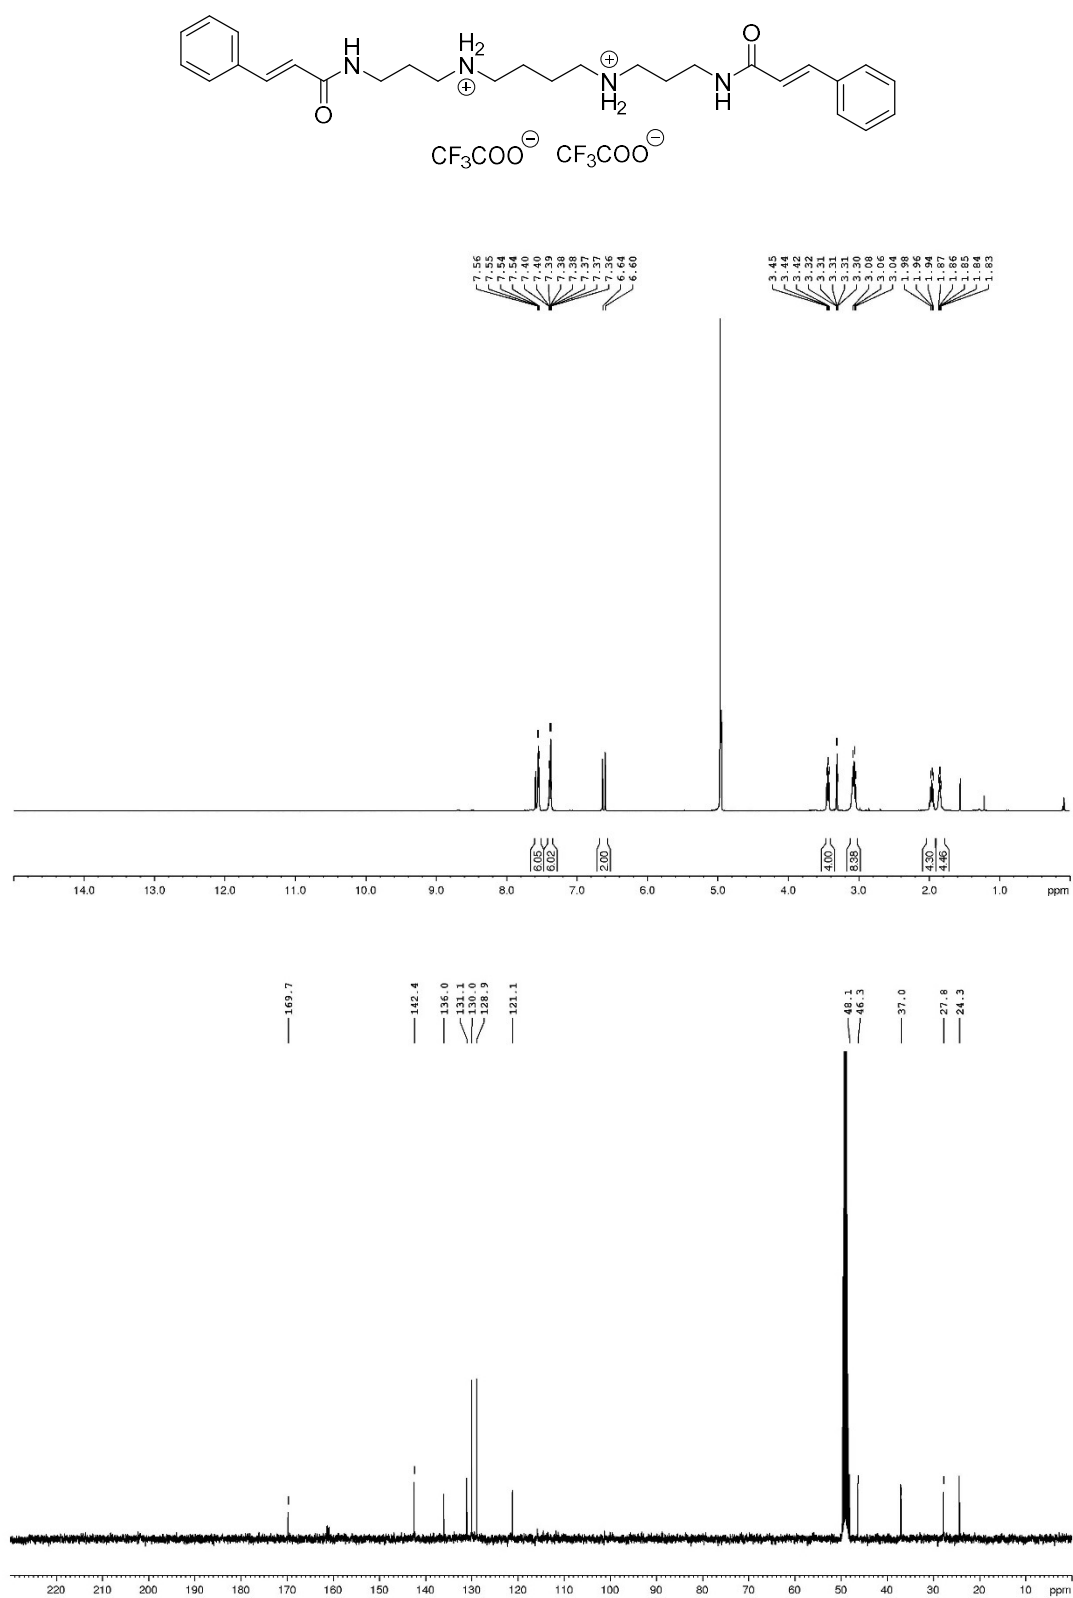

**Figure S1.**  $^1\text{H}$  ( $\text{CD}_3\text{OD}$ , 400 MHz) and  $^{13}\text{C}$  ( $\text{CD}_3\text{OD}$ , 100 MHz) NMR spectra for **13a**.

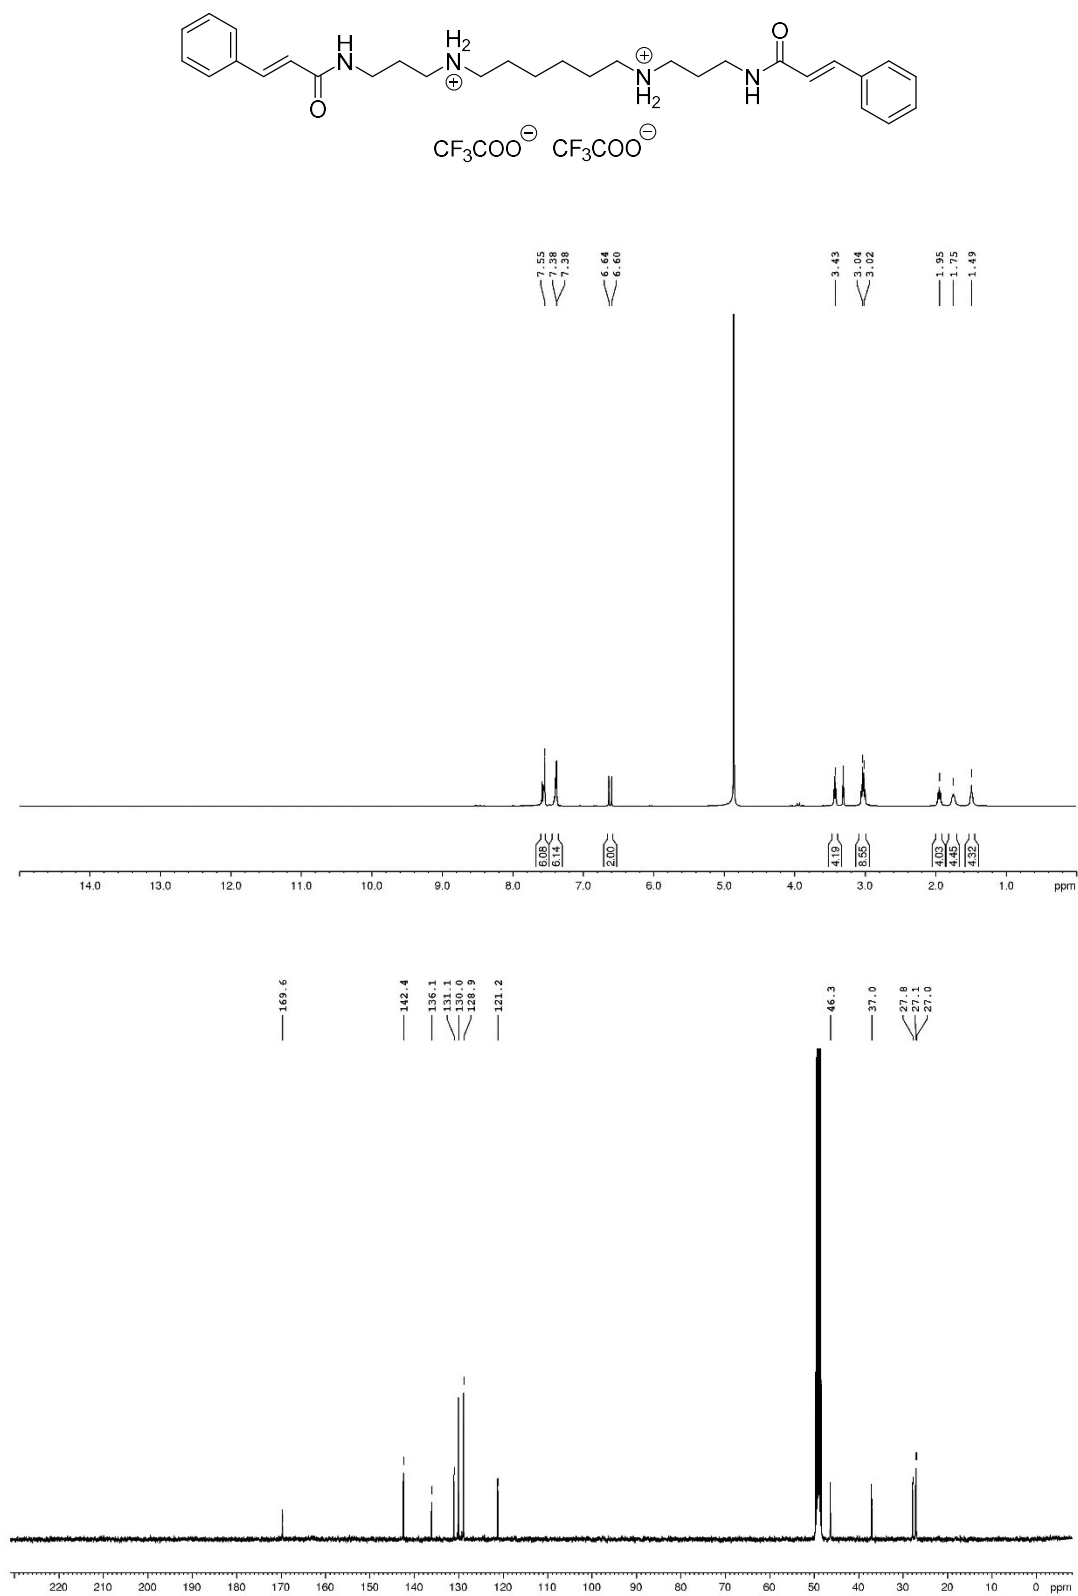

**Figure S2.**  $^1\text{H}$  (CD<sub>3</sub>OD, 400 MHz) and  $^{13}\text{C}$  (CD<sub>3</sub>OD, 100 MHz) NMR spectra for **13b**.

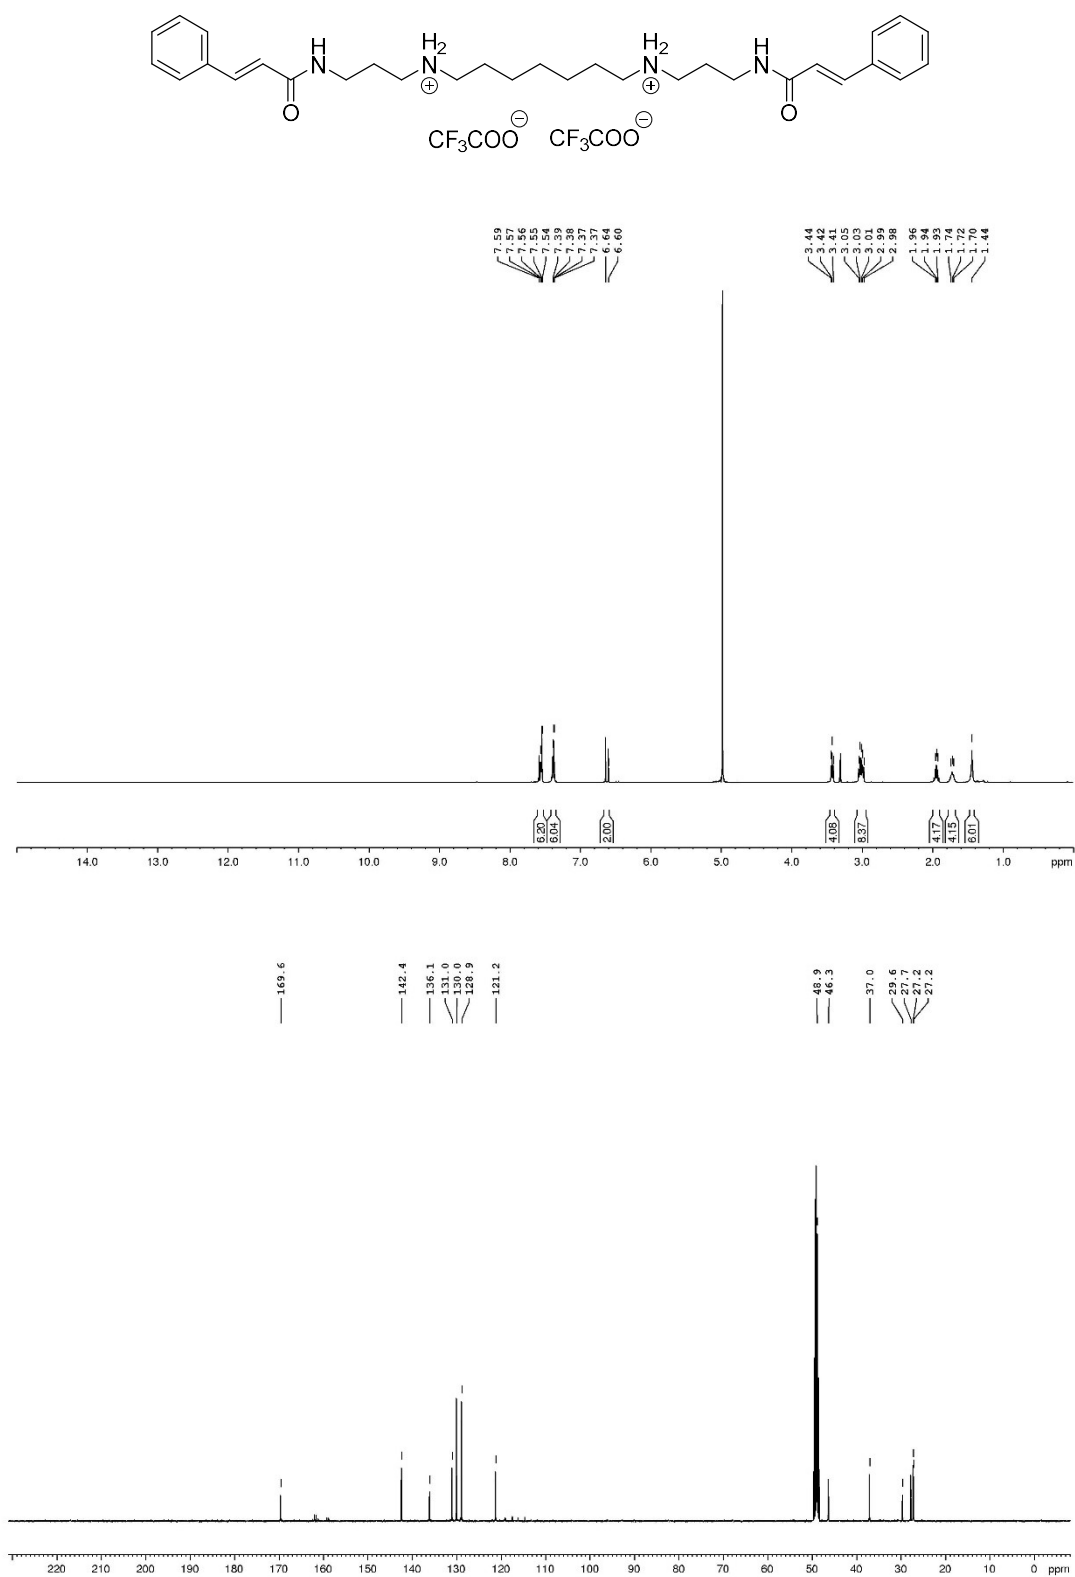

**Figure S3.** <sup>1</sup>H (CD<sub>3</sub>OD, 400 MHz) and <sup>13</sup>C (CD<sub>3</sub>OD, 100 MHz) NMR spectra for **13c**.

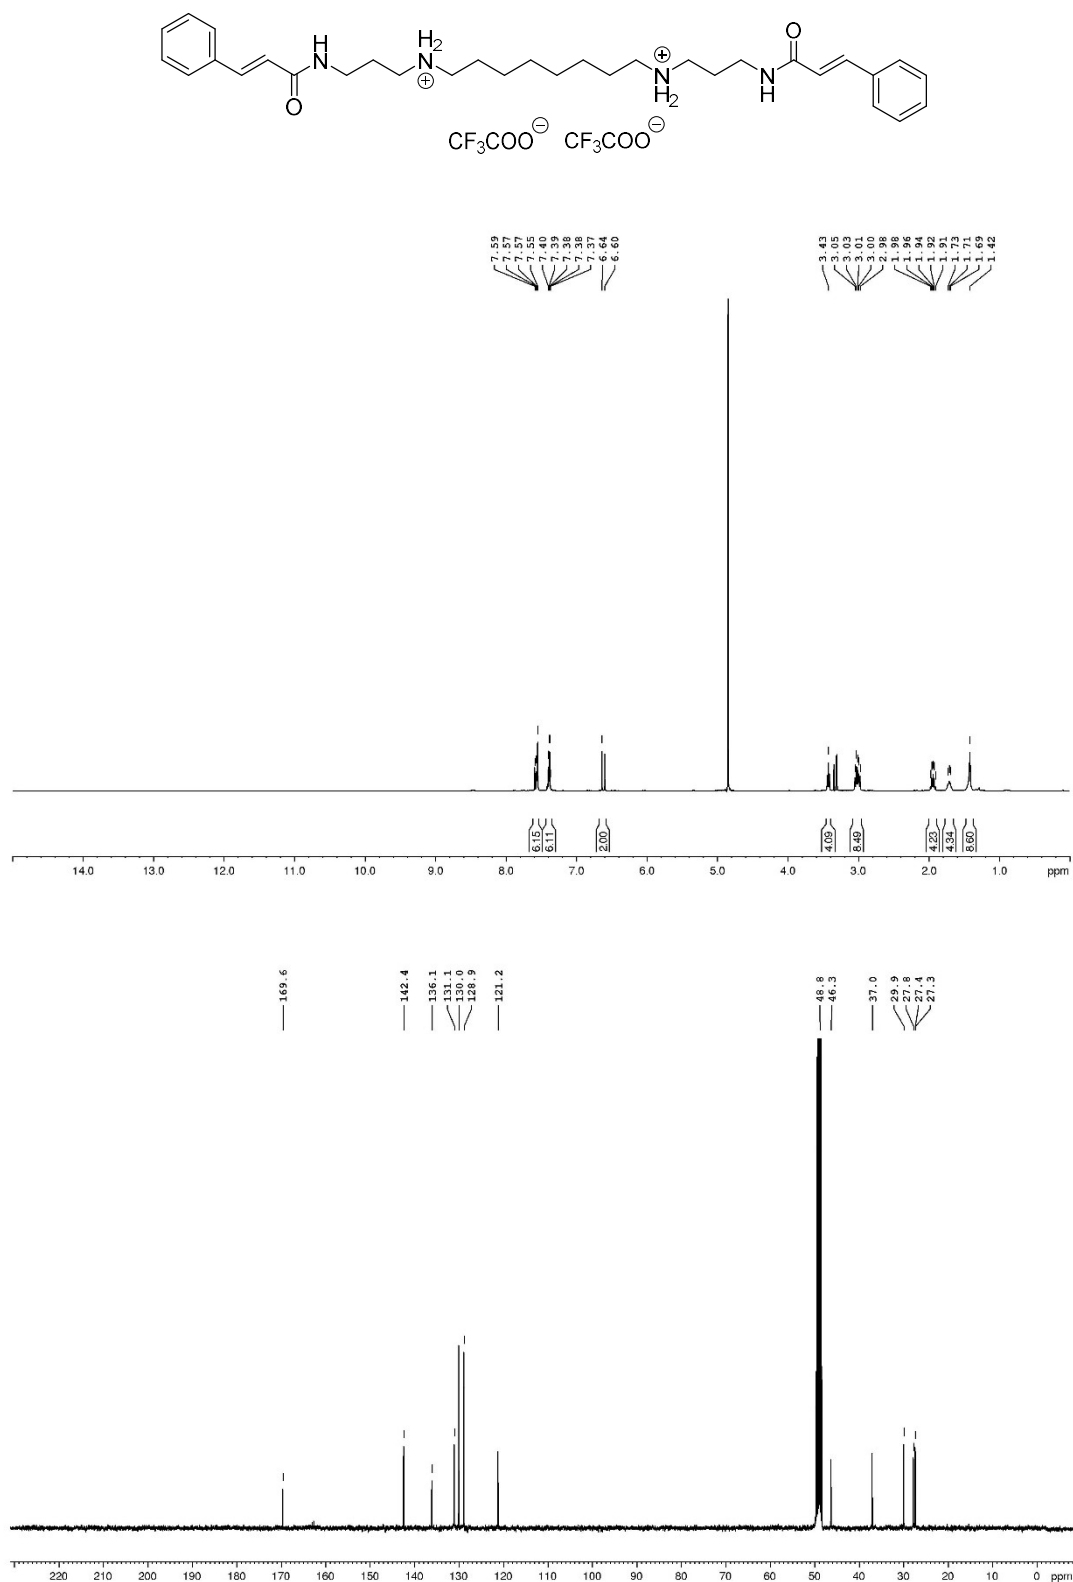

**Figure S4.**  $^1\text{H}$  ( $\text{CD}_3\text{OD}$ , 400 MHz) and  $^{13}\text{C}$  ( $\text{CD}_3\text{OD}$ , 100 MHz) NMR spectra for **13d**.

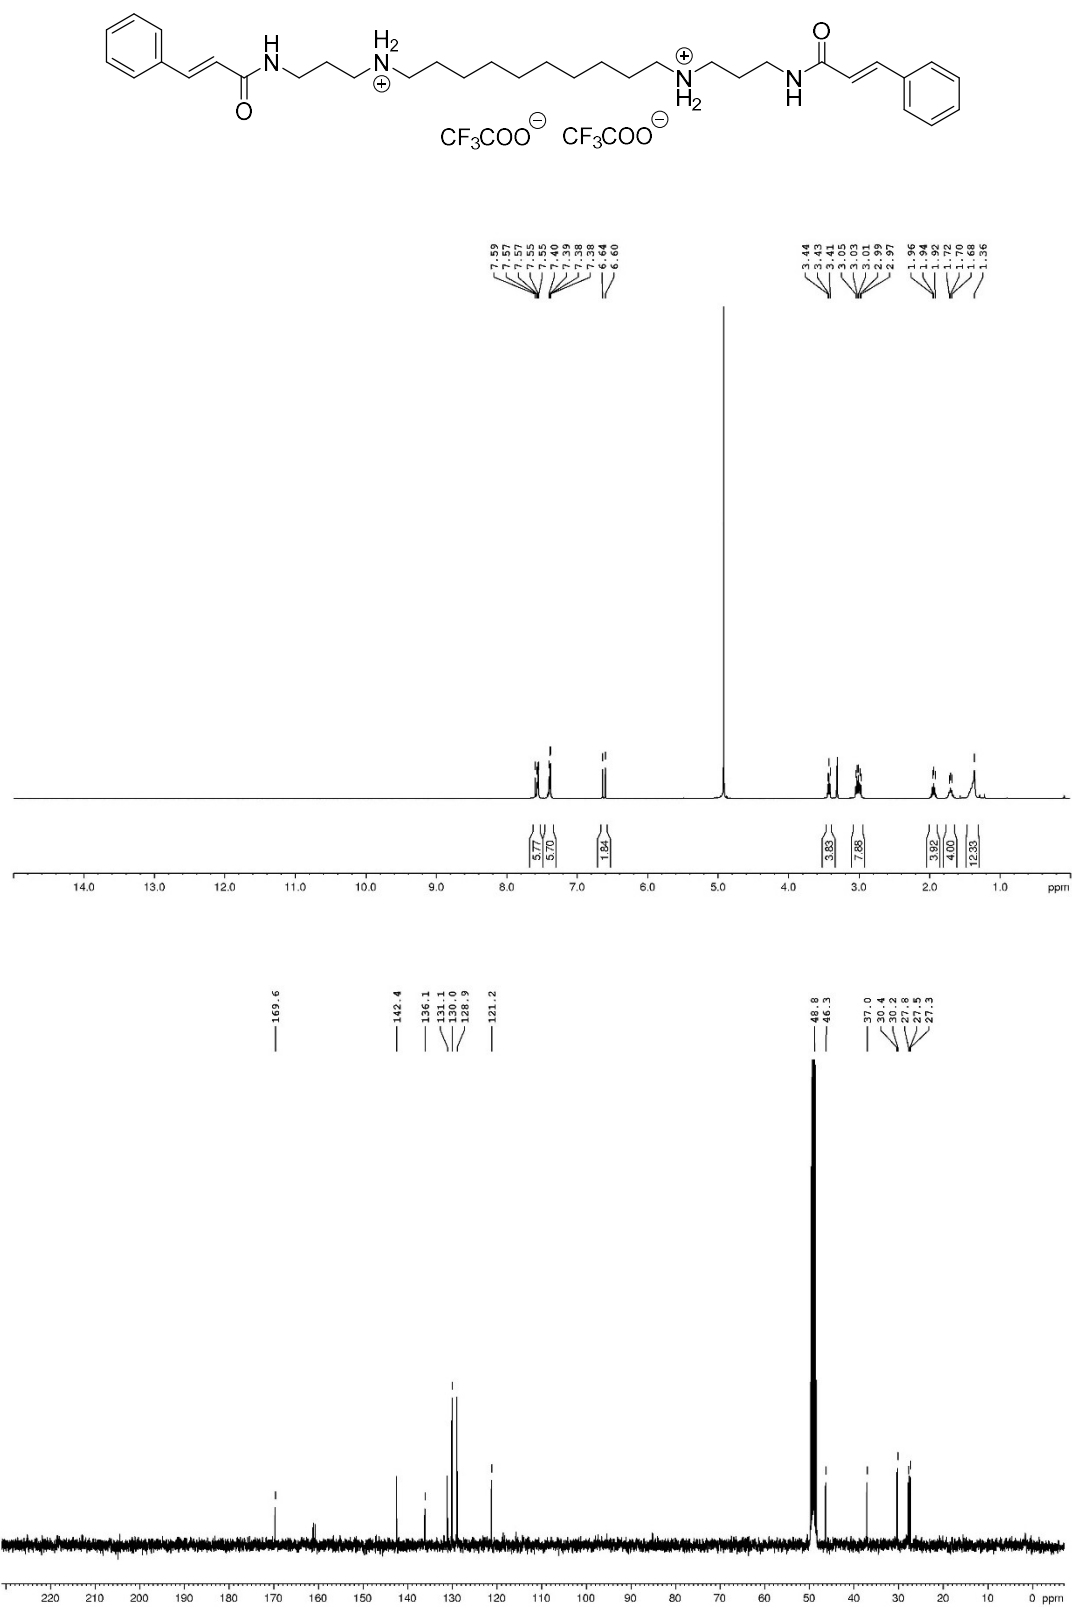

**Figure S5.**  $^1\text{H}$  ( $\text{CD}_3\text{OD}$ , 400 MHz) and  $^{13}\text{C}$  ( $\text{CD}_3\text{OD}$ , 100 MHz) NMR spectra for **13e**.

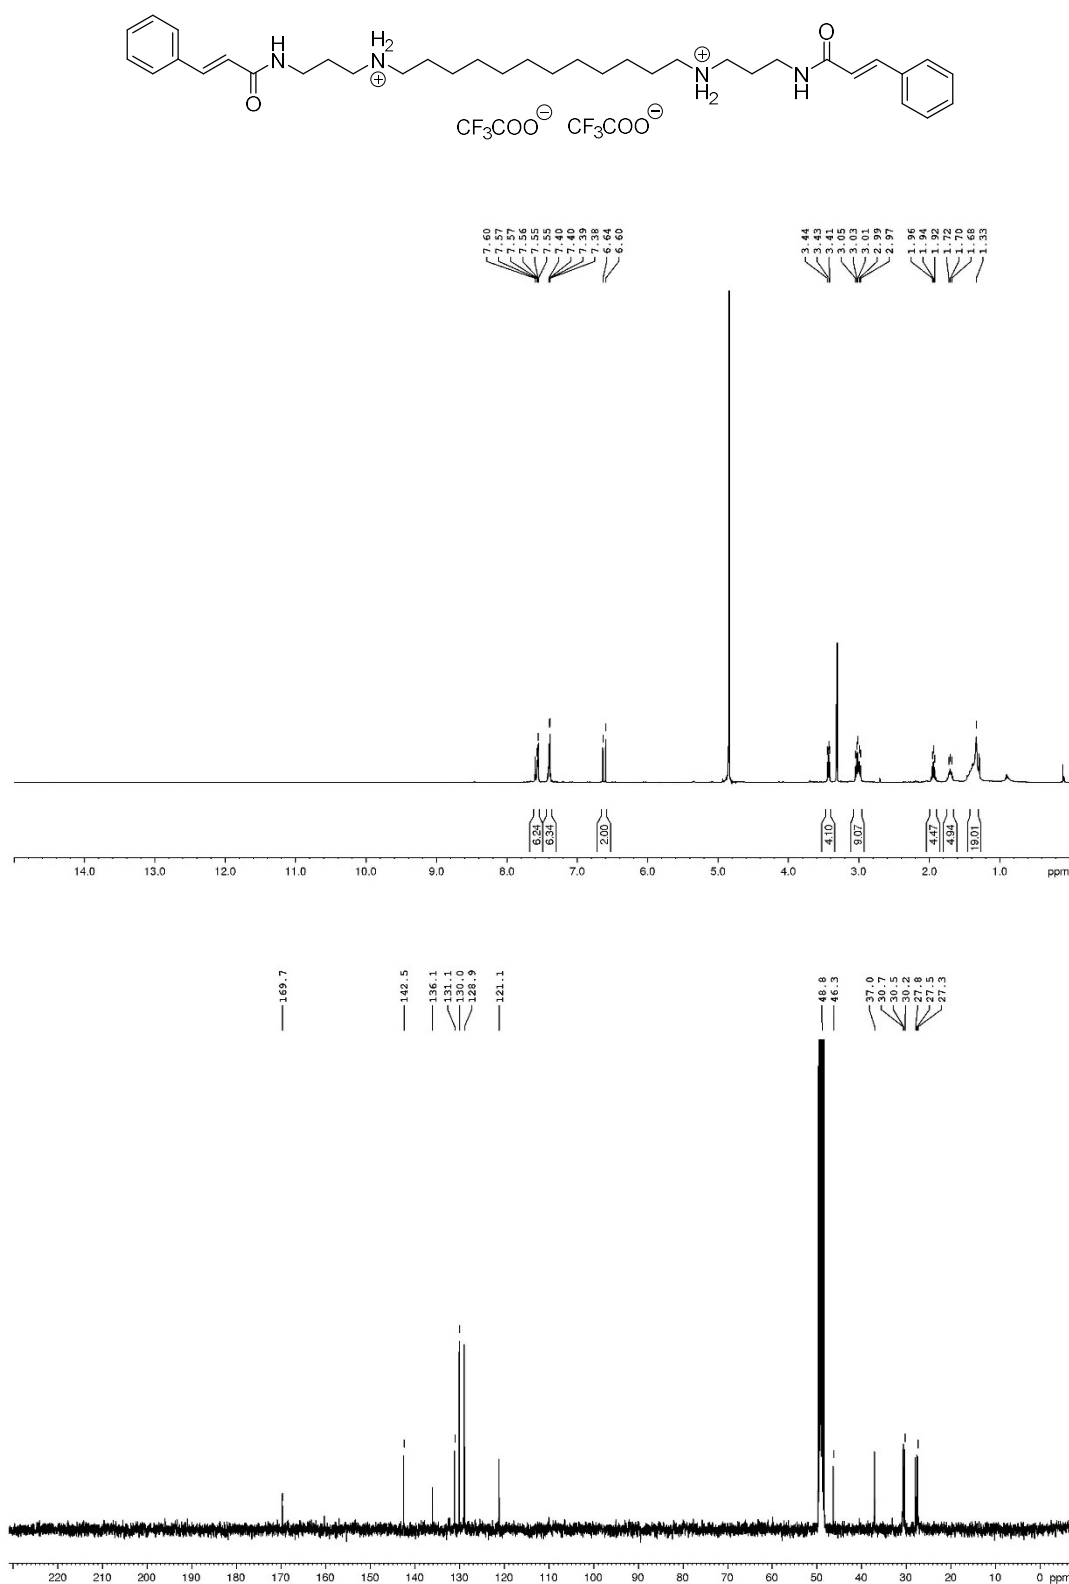

**Figure S6.** <sup>1</sup>H (CD<sub>3</sub>OD, 400 MHz) and <sup>13</sup>C (CD<sub>3</sub>OD, 100 MHz) NMR spectra for **13f**.



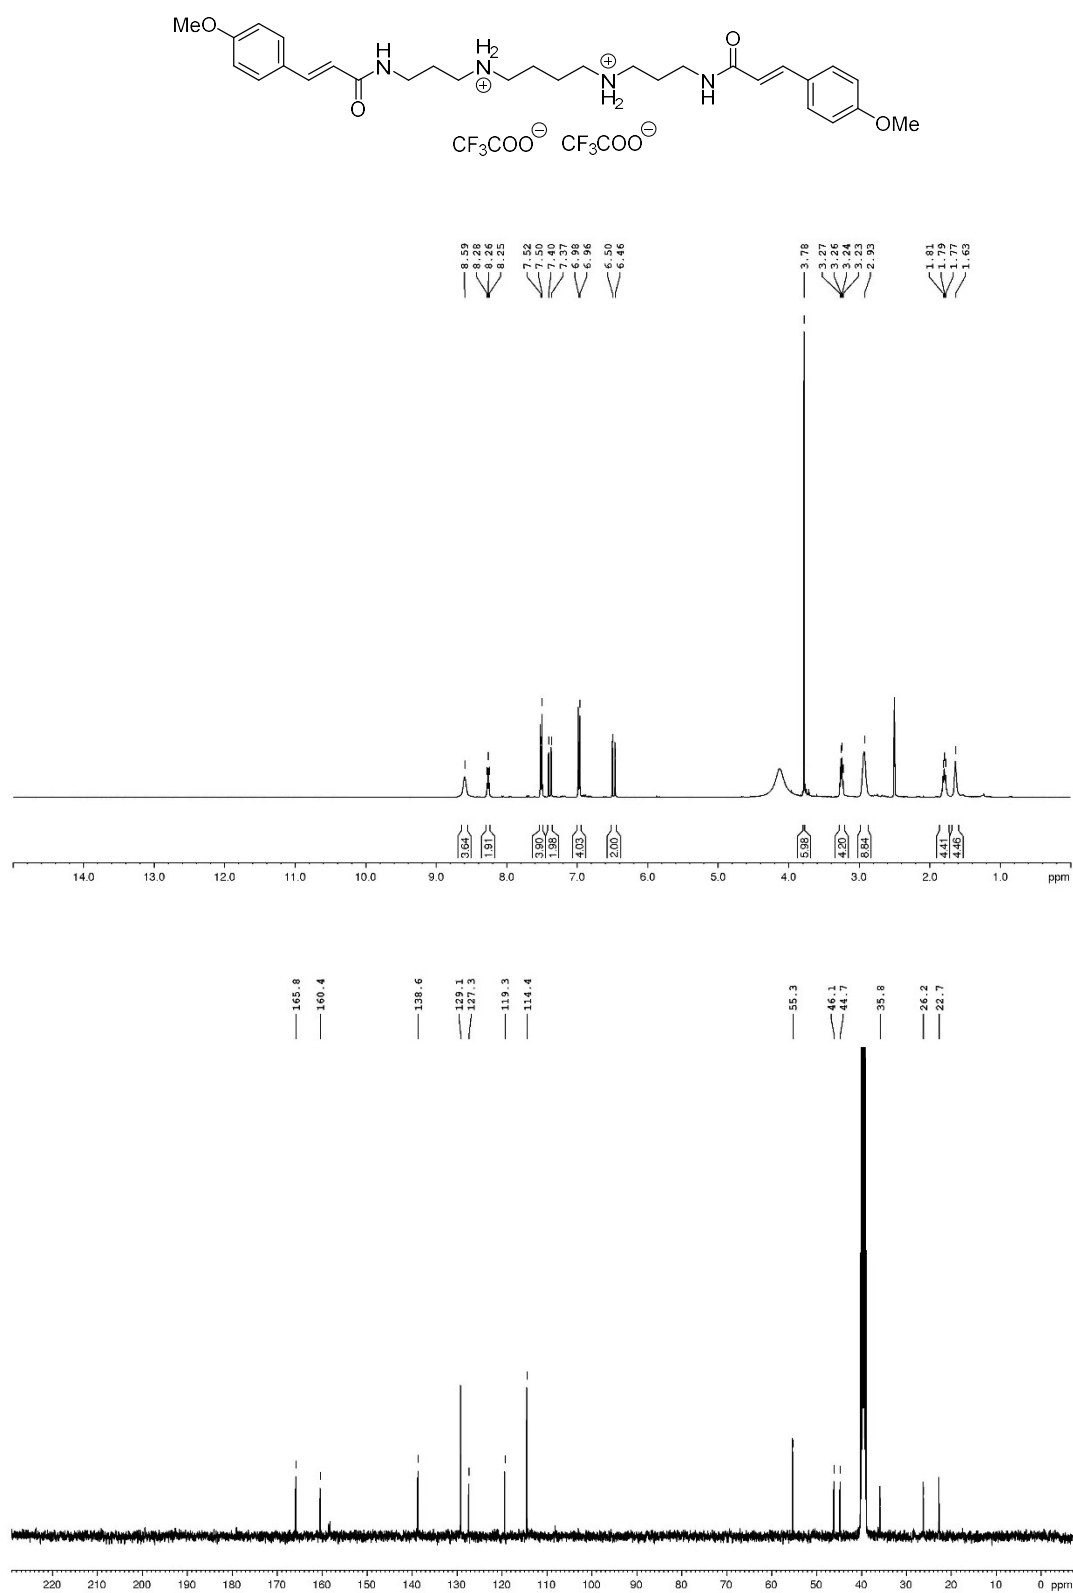

**Figure S7.** <sup>1</sup>H (DMSO-*d*<sub>6</sub>, 400 MHz) and <sup>13</sup>C (DMSO-*d*<sub>6</sub>, 100 MHz) NMR spectra for **14a**.

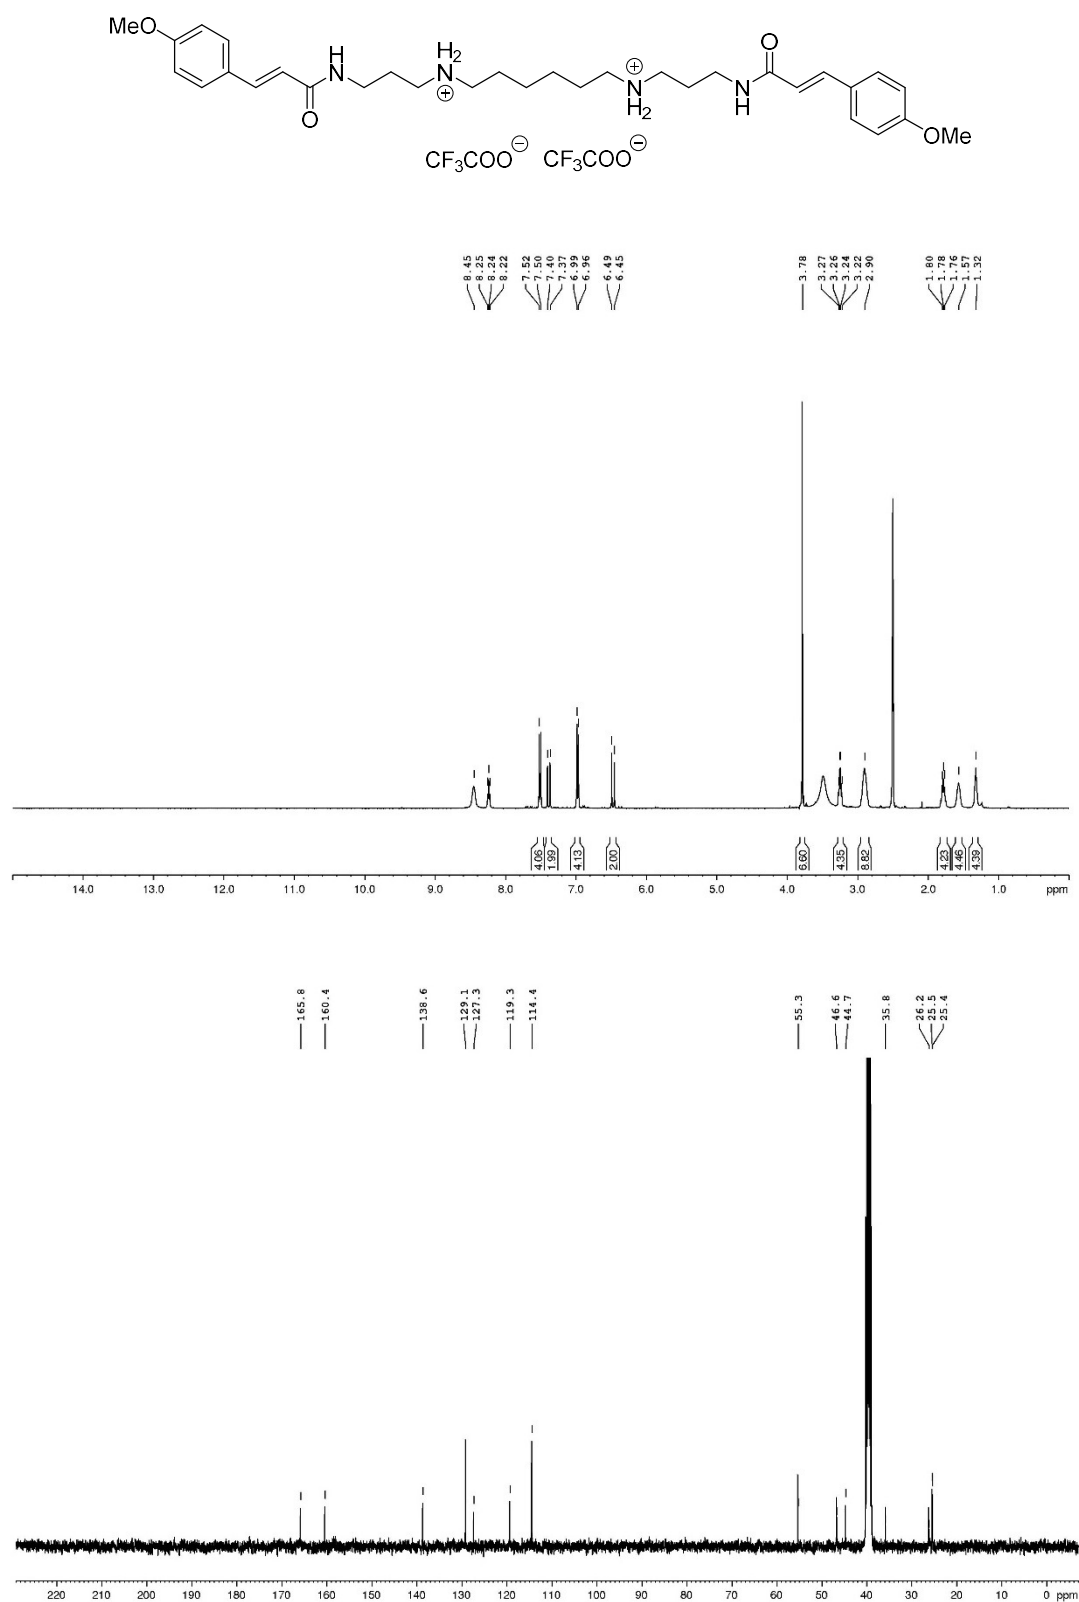

**Figure S8.**  $^1\text{H}$  (DMSO- $d_6$ , 400 MHz) and  $^{13}\text{C}$  (DMSO- $d_6$ , 100 MHz) NMR spectra for **14b**.

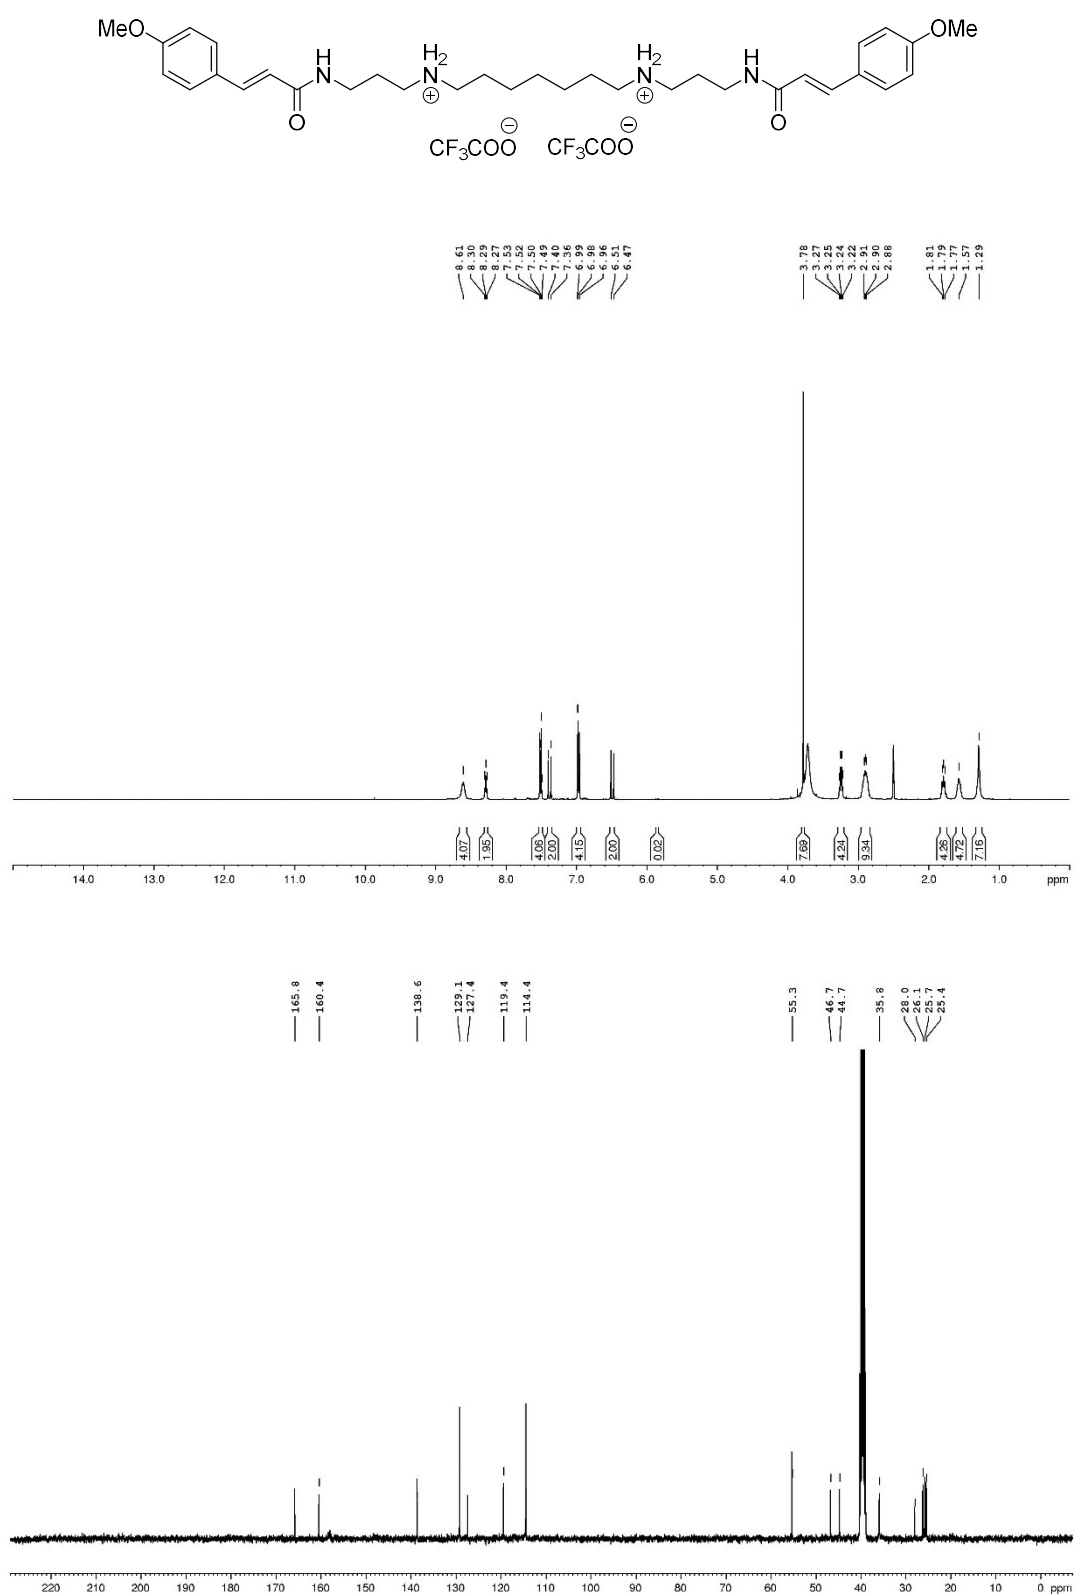

**Figure S9.**  $^1\text{H}$  ( $\text{DMSO}-d_6$ , 400 MHz) and  $^{13}\text{C}$  ( $\text{DMSO}-d_6$ , 100 MHz) NMR spectra for **14c**.

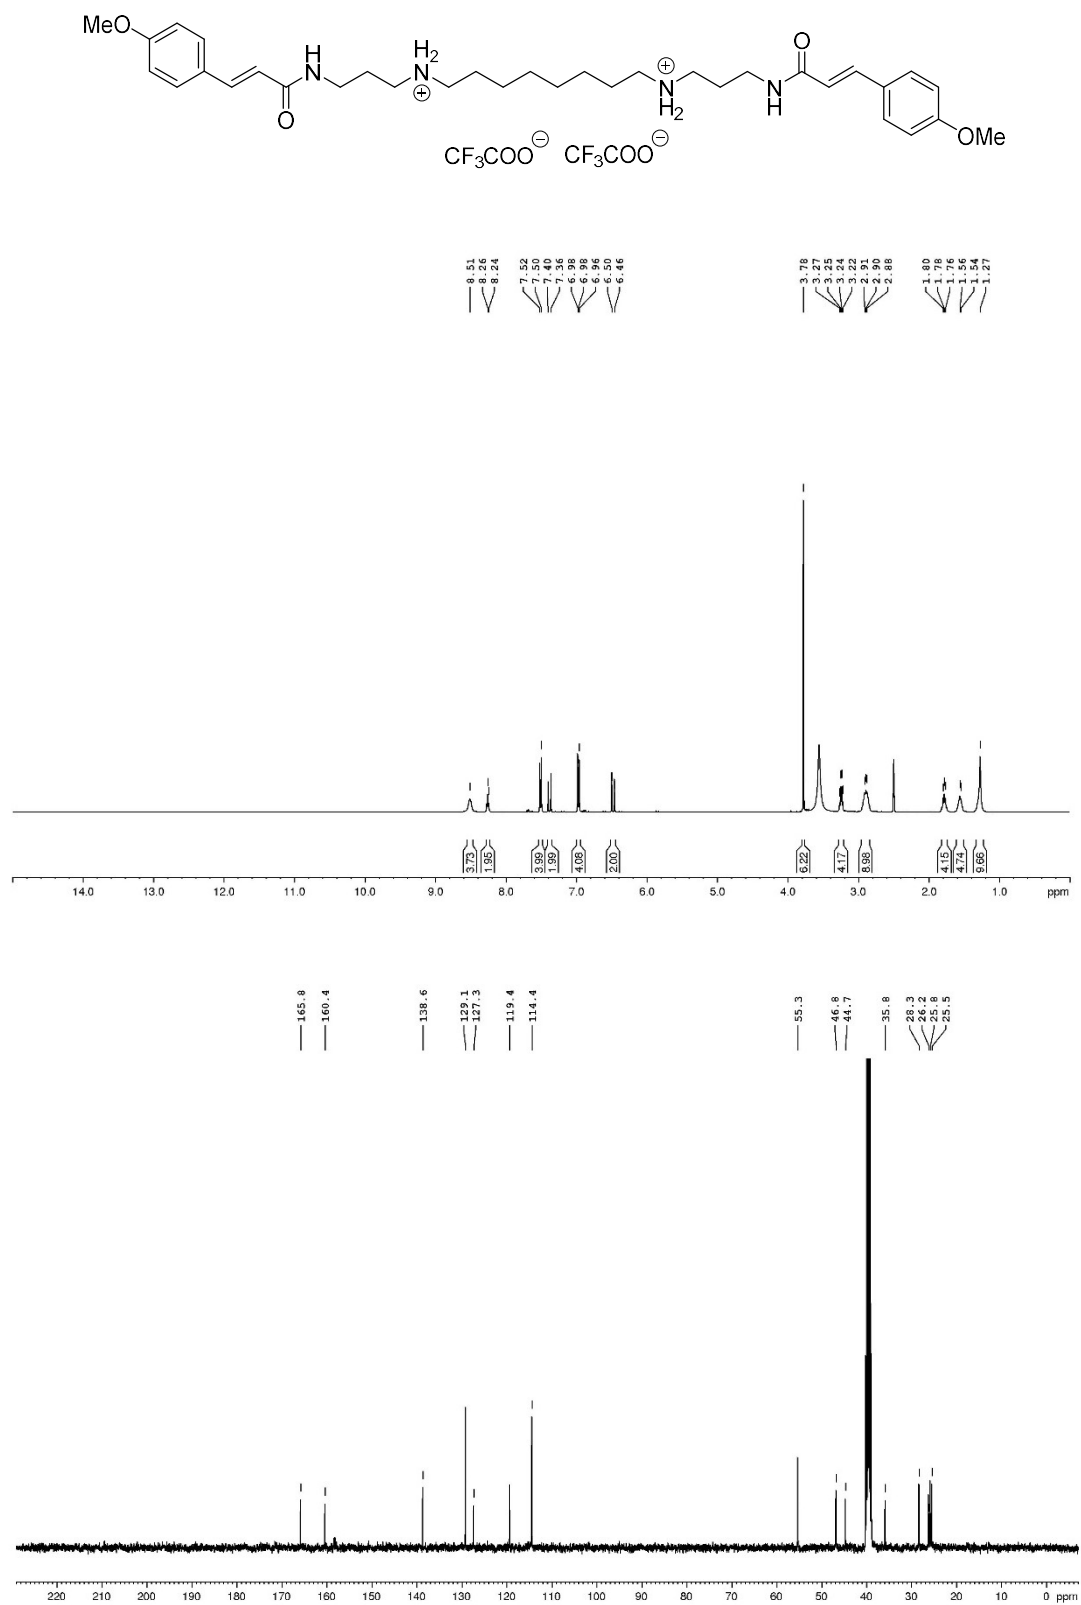

**Figure S10.**  $^1\text{H}$  (DMSO- $d_6$ , 400 MHz) and  $^{13}\text{C}$  (DMSO- $d_6$ , 100 MHz) NMR spectra for **14d**.

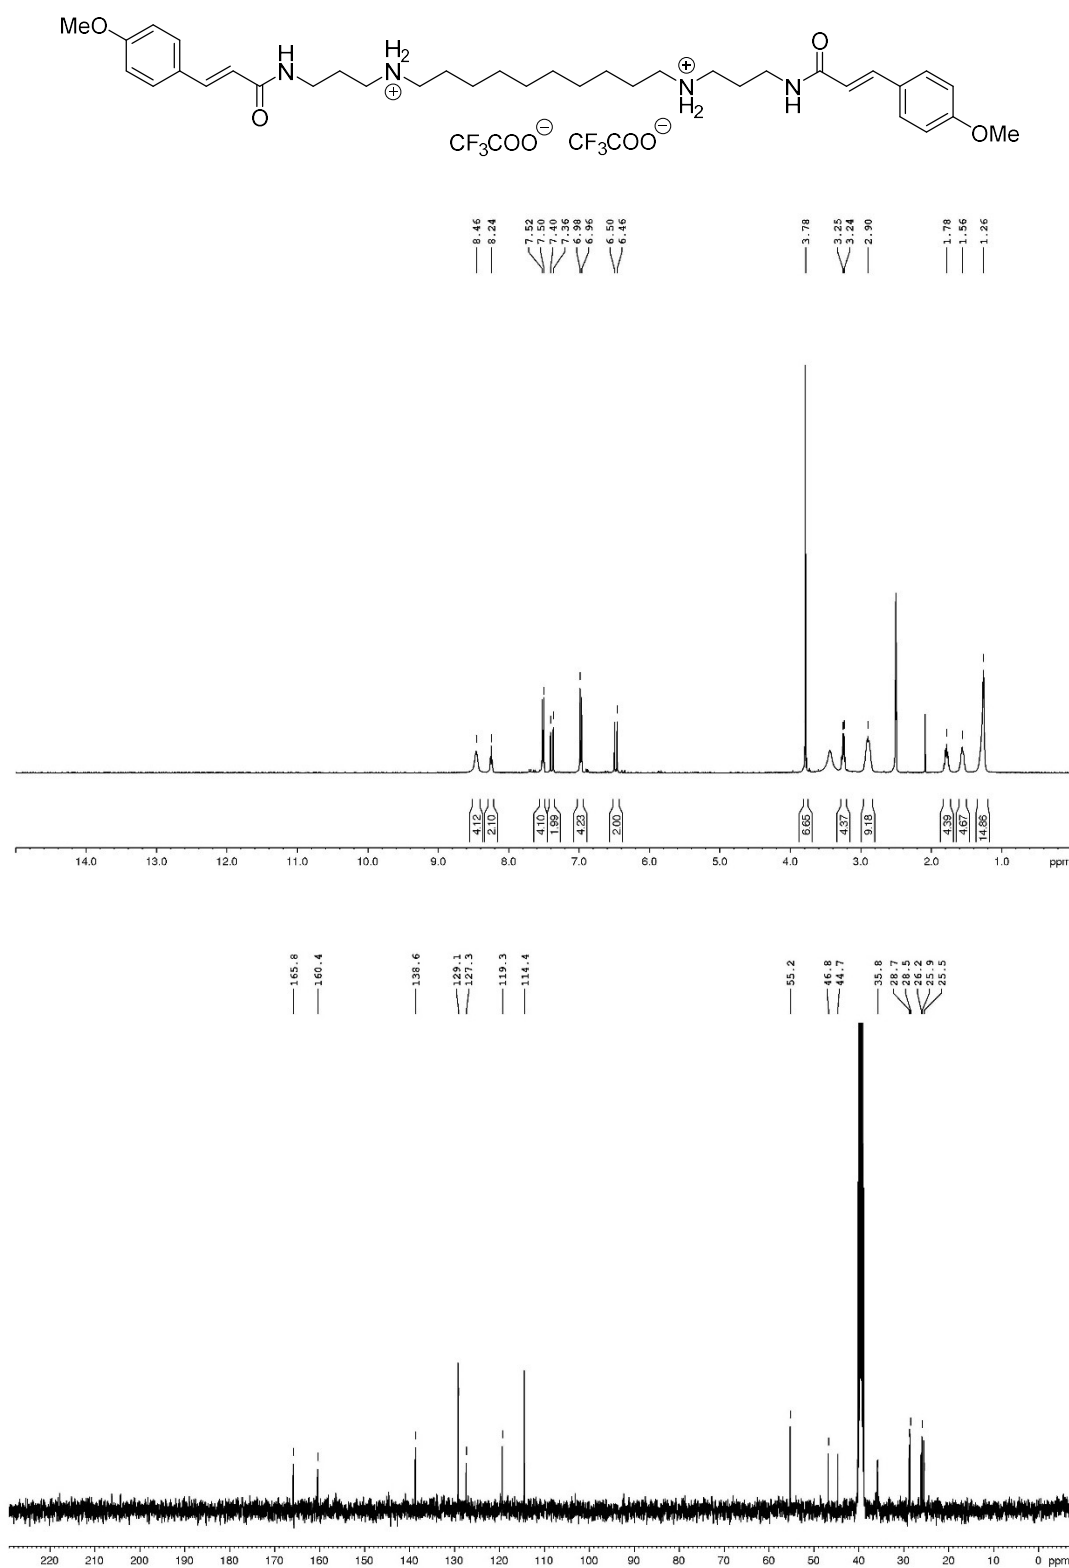

**Figure S11.**  $^1\text{H}$  ( $\text{DMSO}-d_6$ , 400 MHz) and  $^{13}\text{C}$  ( $\text{DMSO}-d_6$ , 100 MHz) NMR spectra for **14e**.

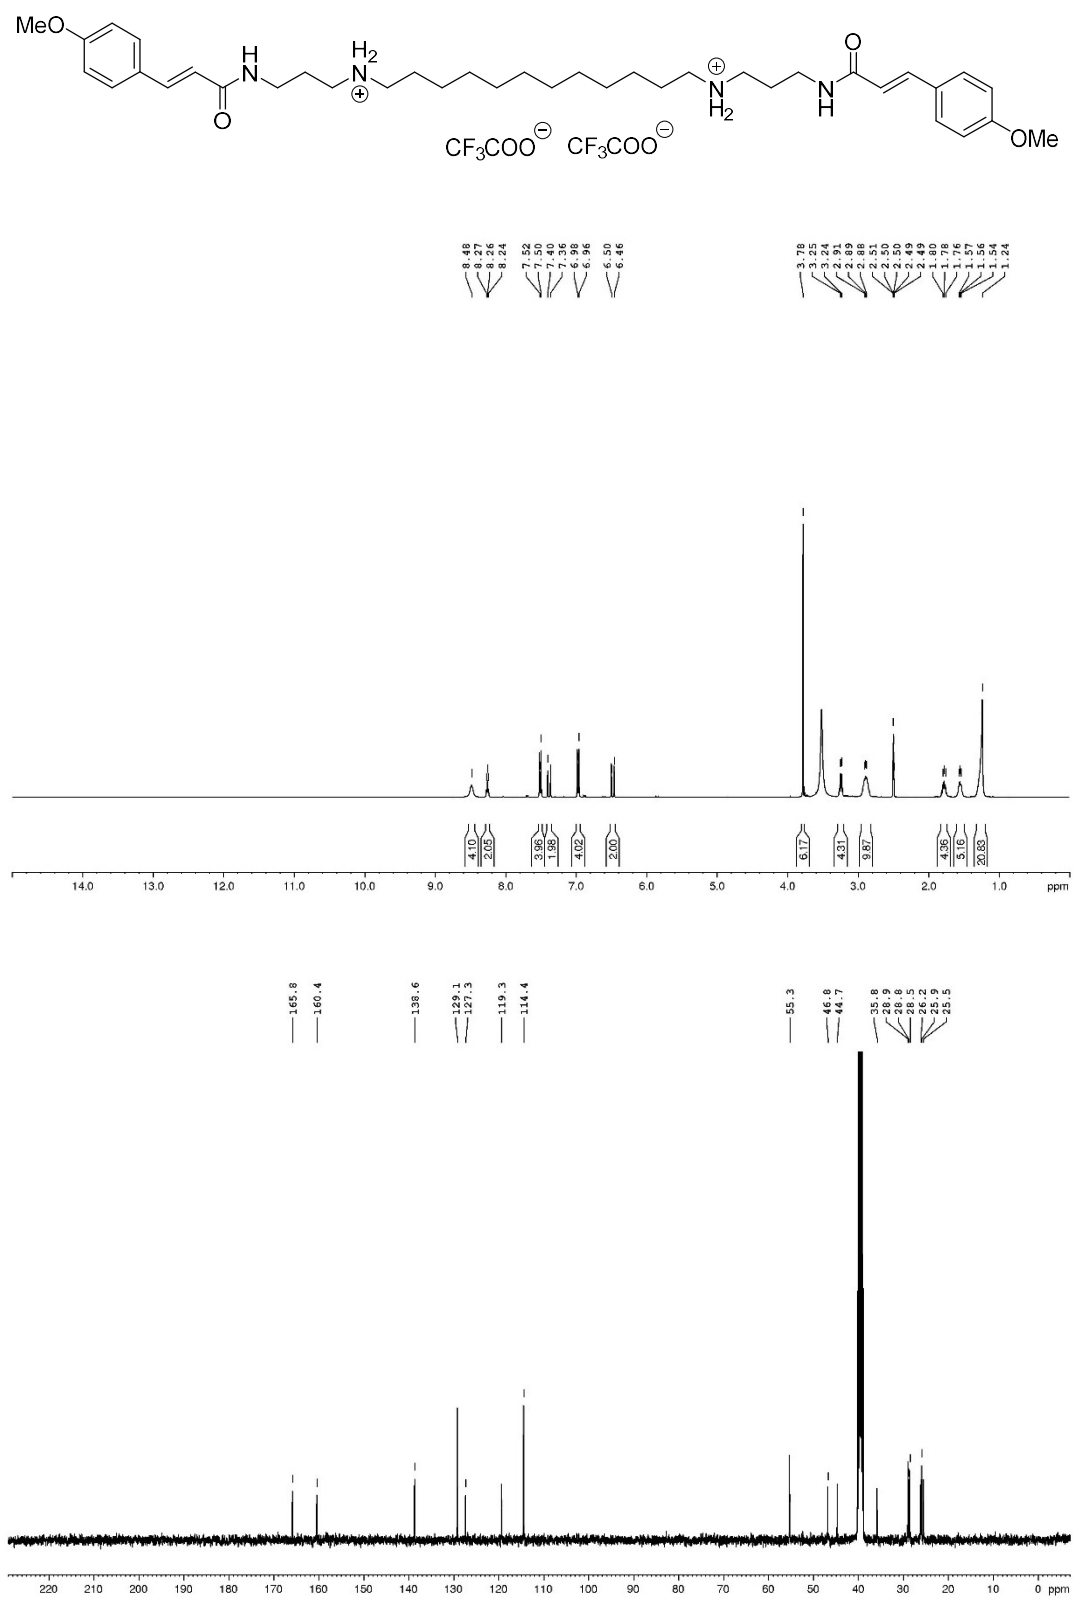

**Figure S12.**  $^1\text{H}$  (DMSO- $d_6$ , 400 MHz) and  $^{13}\text{C}$  (DMSO- $d_6$ , 100 MHz) NMR spectra for **14f**.

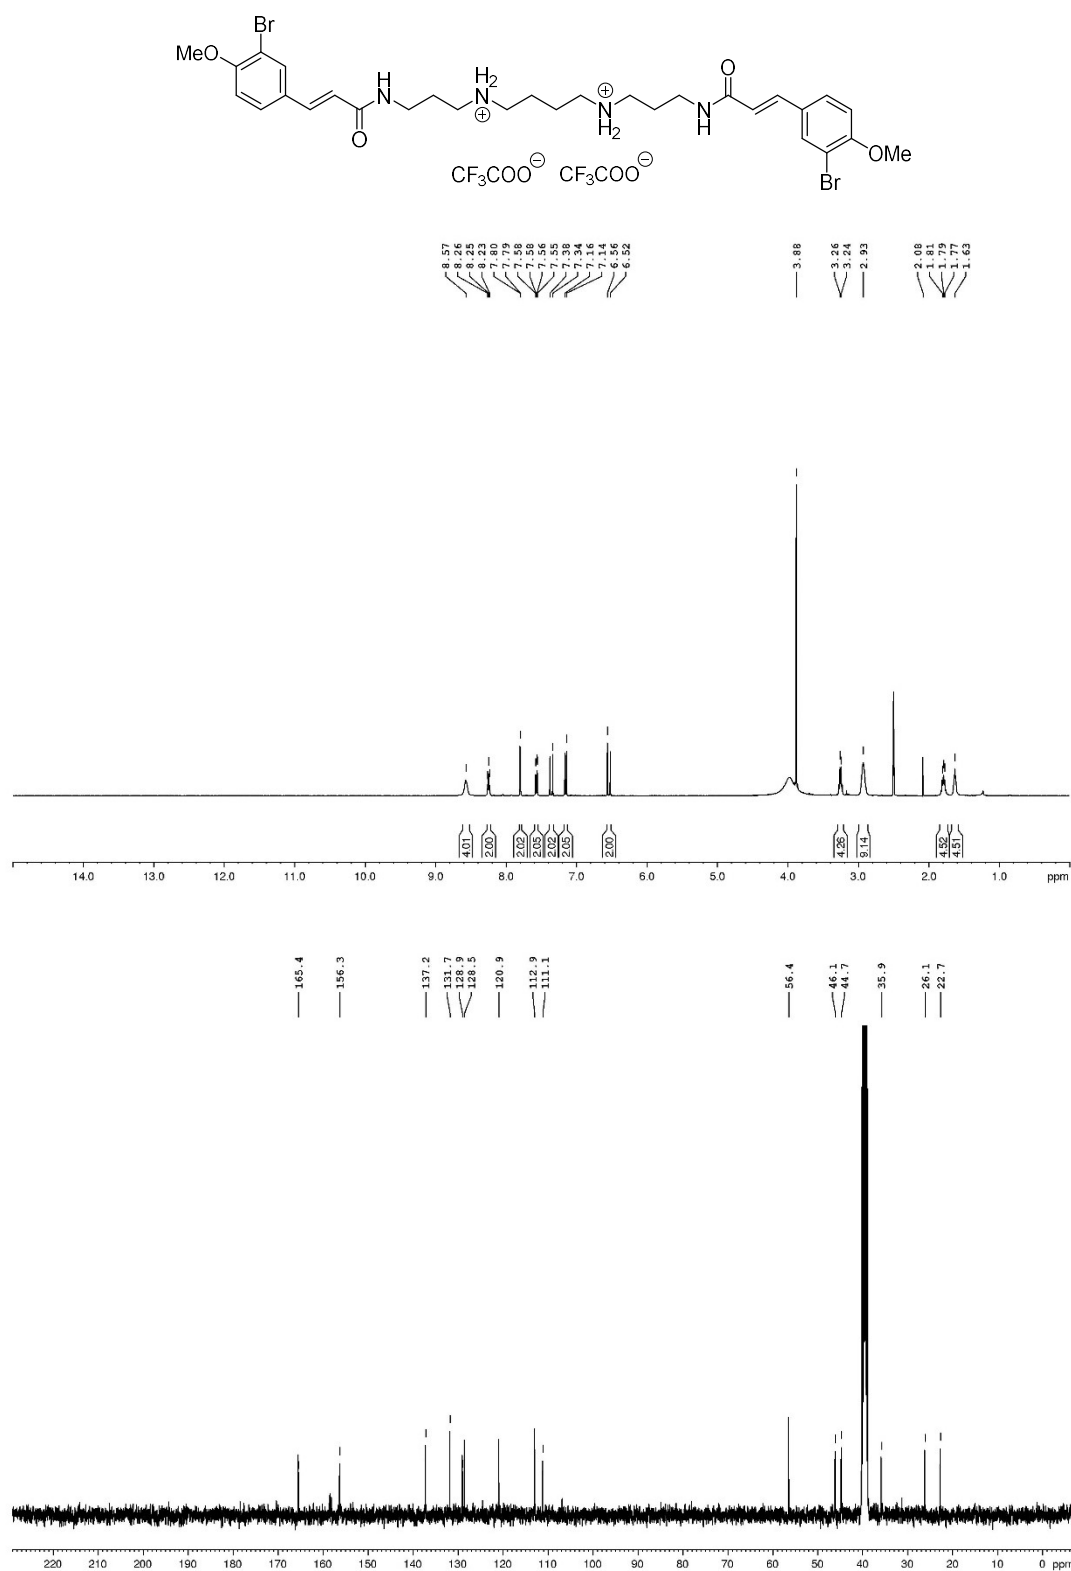

**Figure S13.**  $^1\text{H}$  (DMSO- $d_6$ , 400 MHz) and  $^{13}\text{C}$  (DMSO- $d_6$ , 100 MHz) NMR spectra for **15a**.

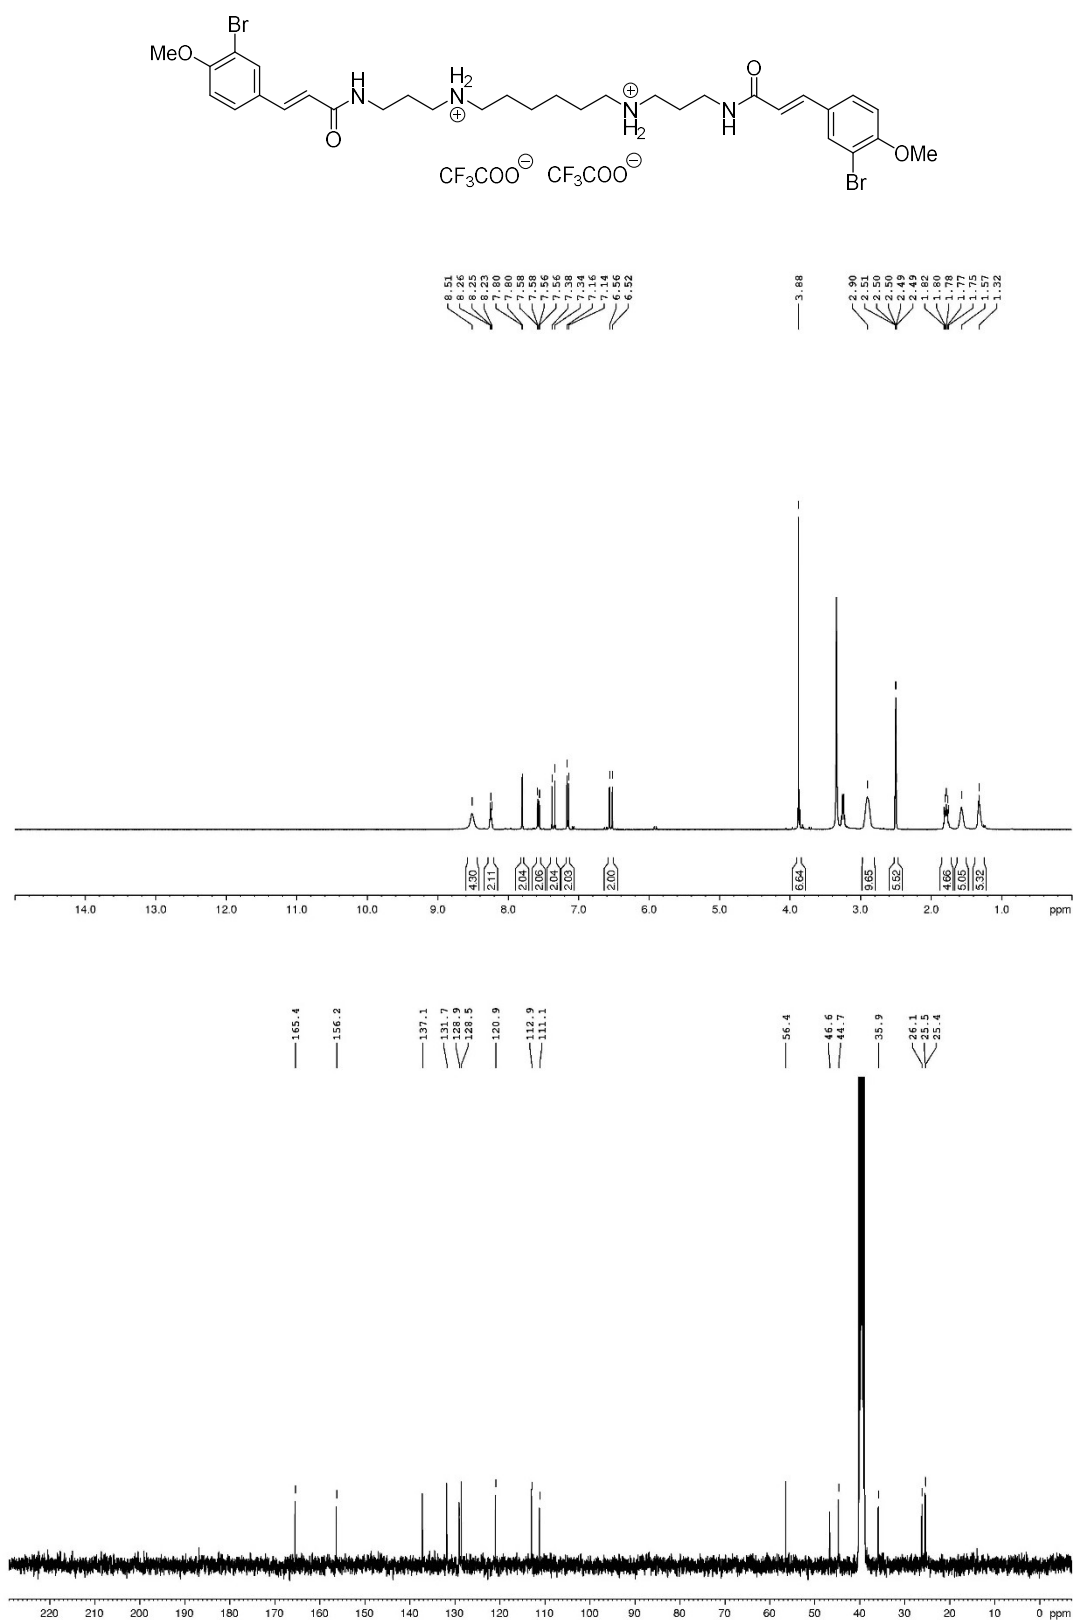

**Figure S14.**  $^1\text{H}$  (DMSO- $d_6$ , 400 MHz) and  $^{13}\text{C}$  (DMSO- $d_6$ , 100 MHz) NMR spectra for **15b**.



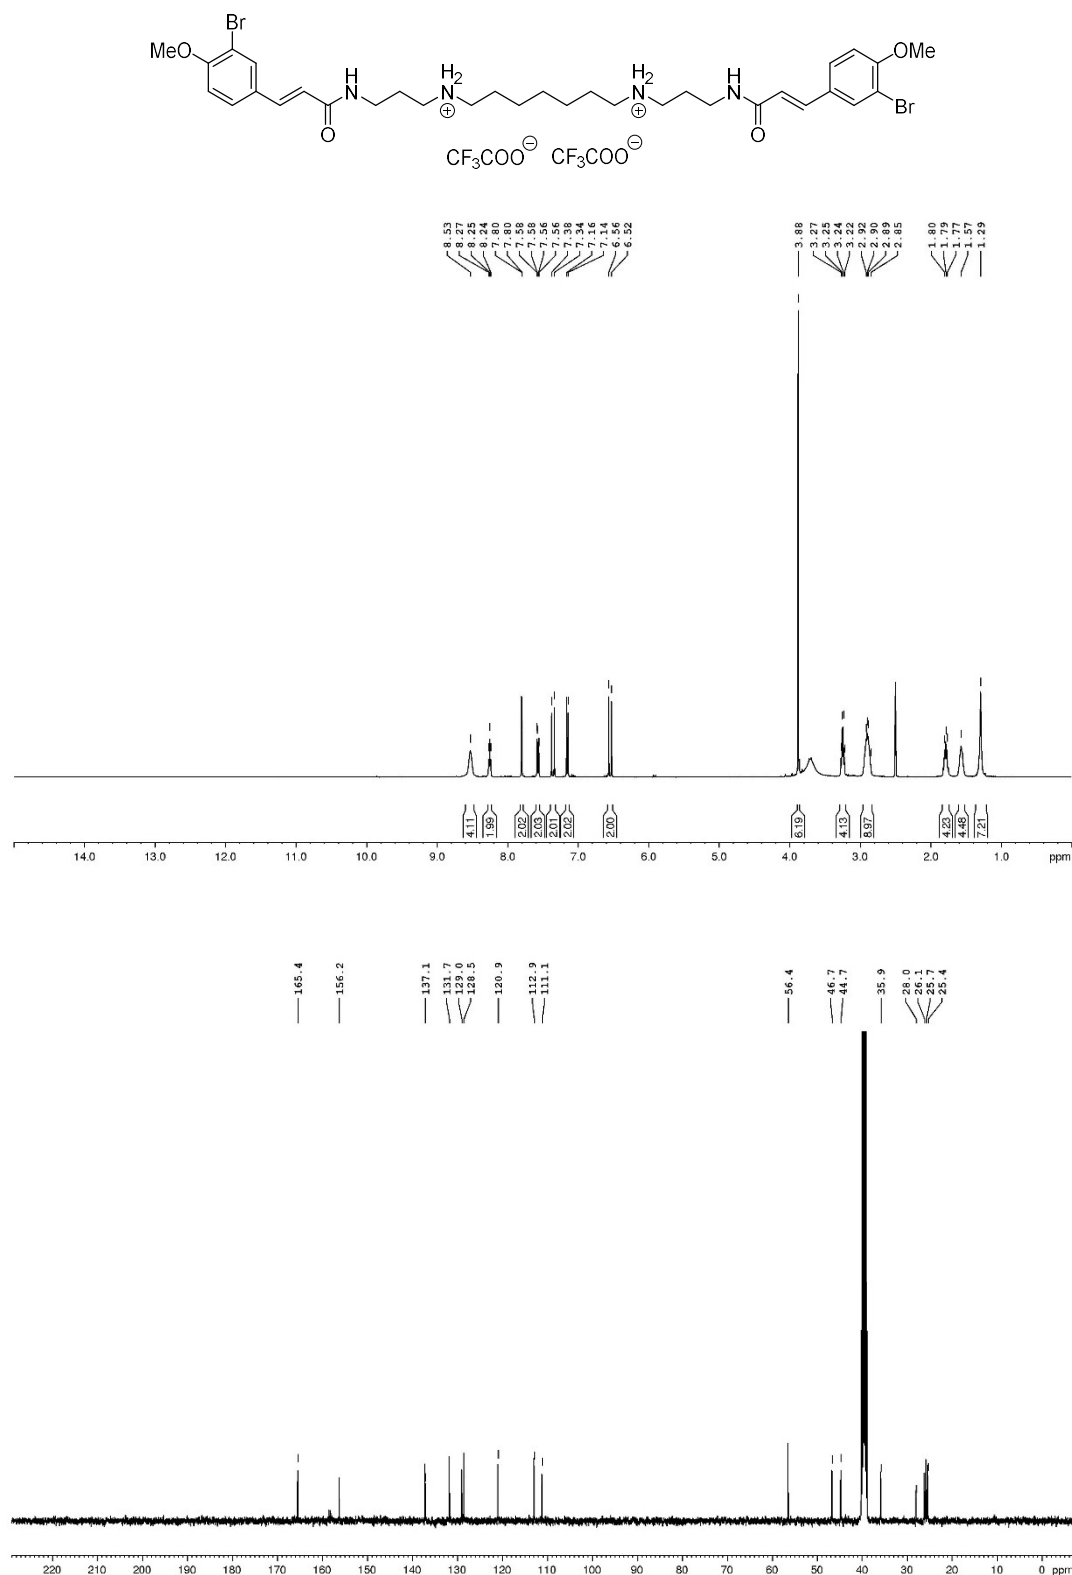

**Figure S15.**  $^1\text{H}$  ( $\text{DMSO-}d_6$ , 400 MHz) and  $^{13}\text{C}$  ( $\text{DMSO-}d_6$ , 100 MHz) NMR spectra for **15c**.

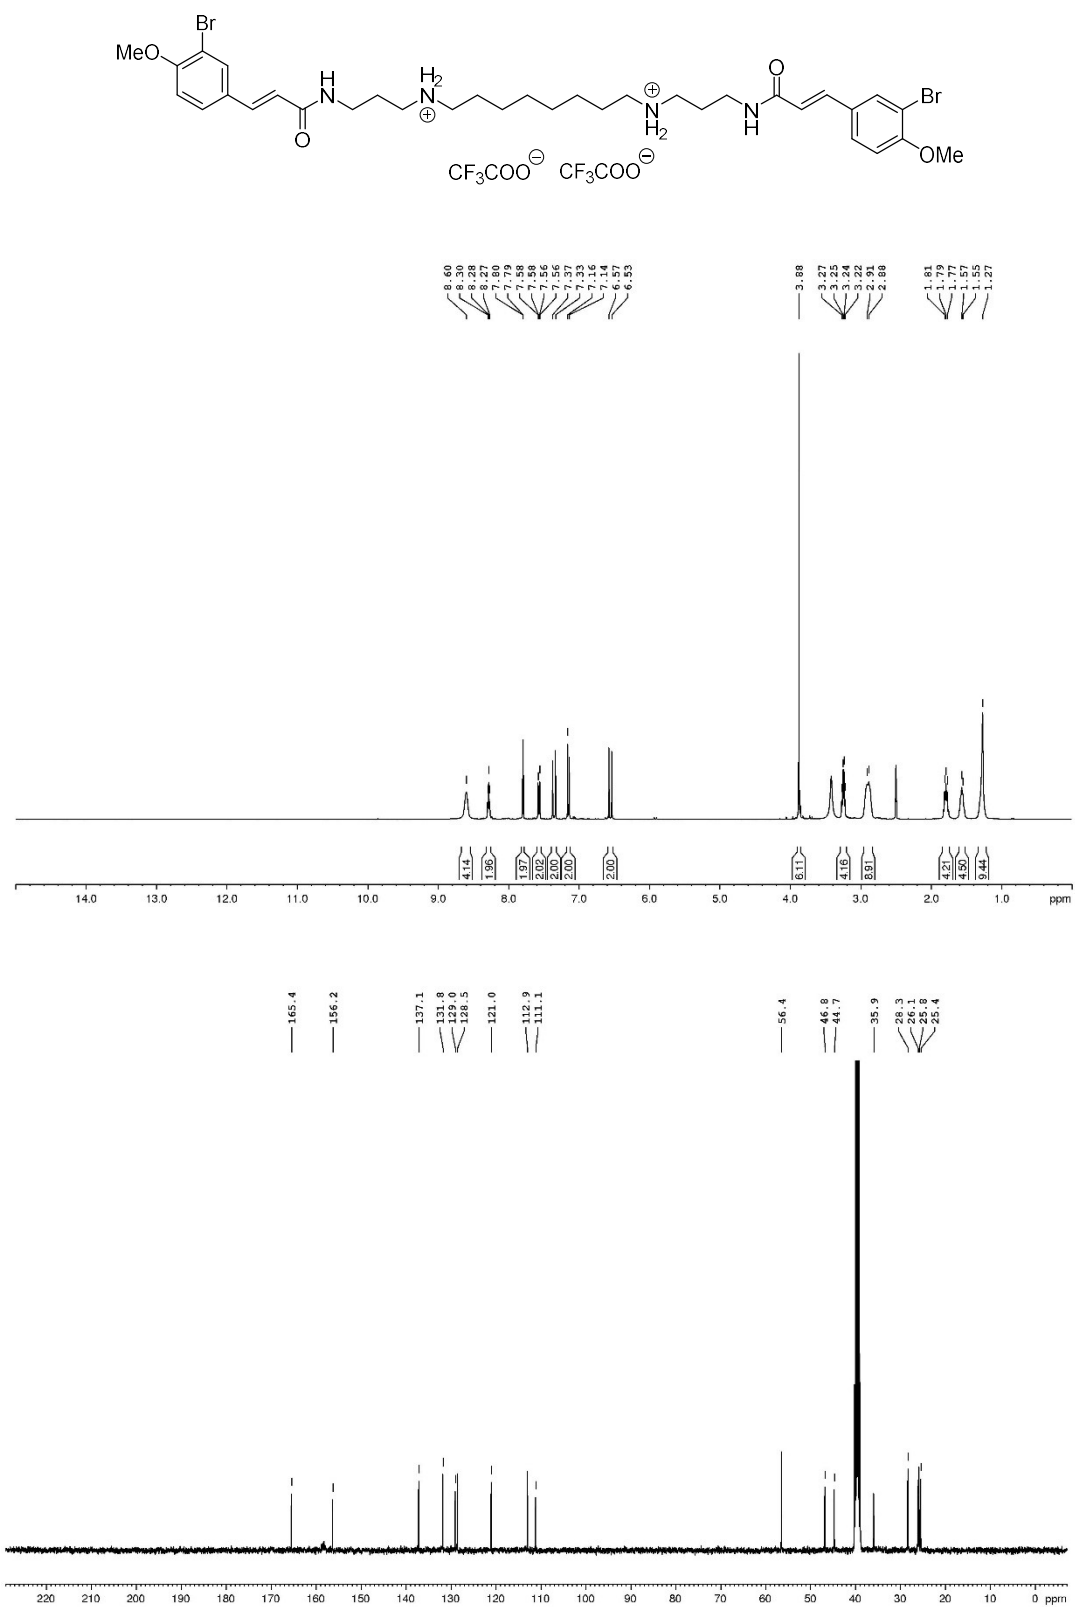

Figure S16.  $^1\text{H}$  (DMSO- $d_6$ , 400 MHz) and  $^{13}\text{C}$  (DMSO- $d_6$ , 100 MHz) NMR spectra for **15d**.

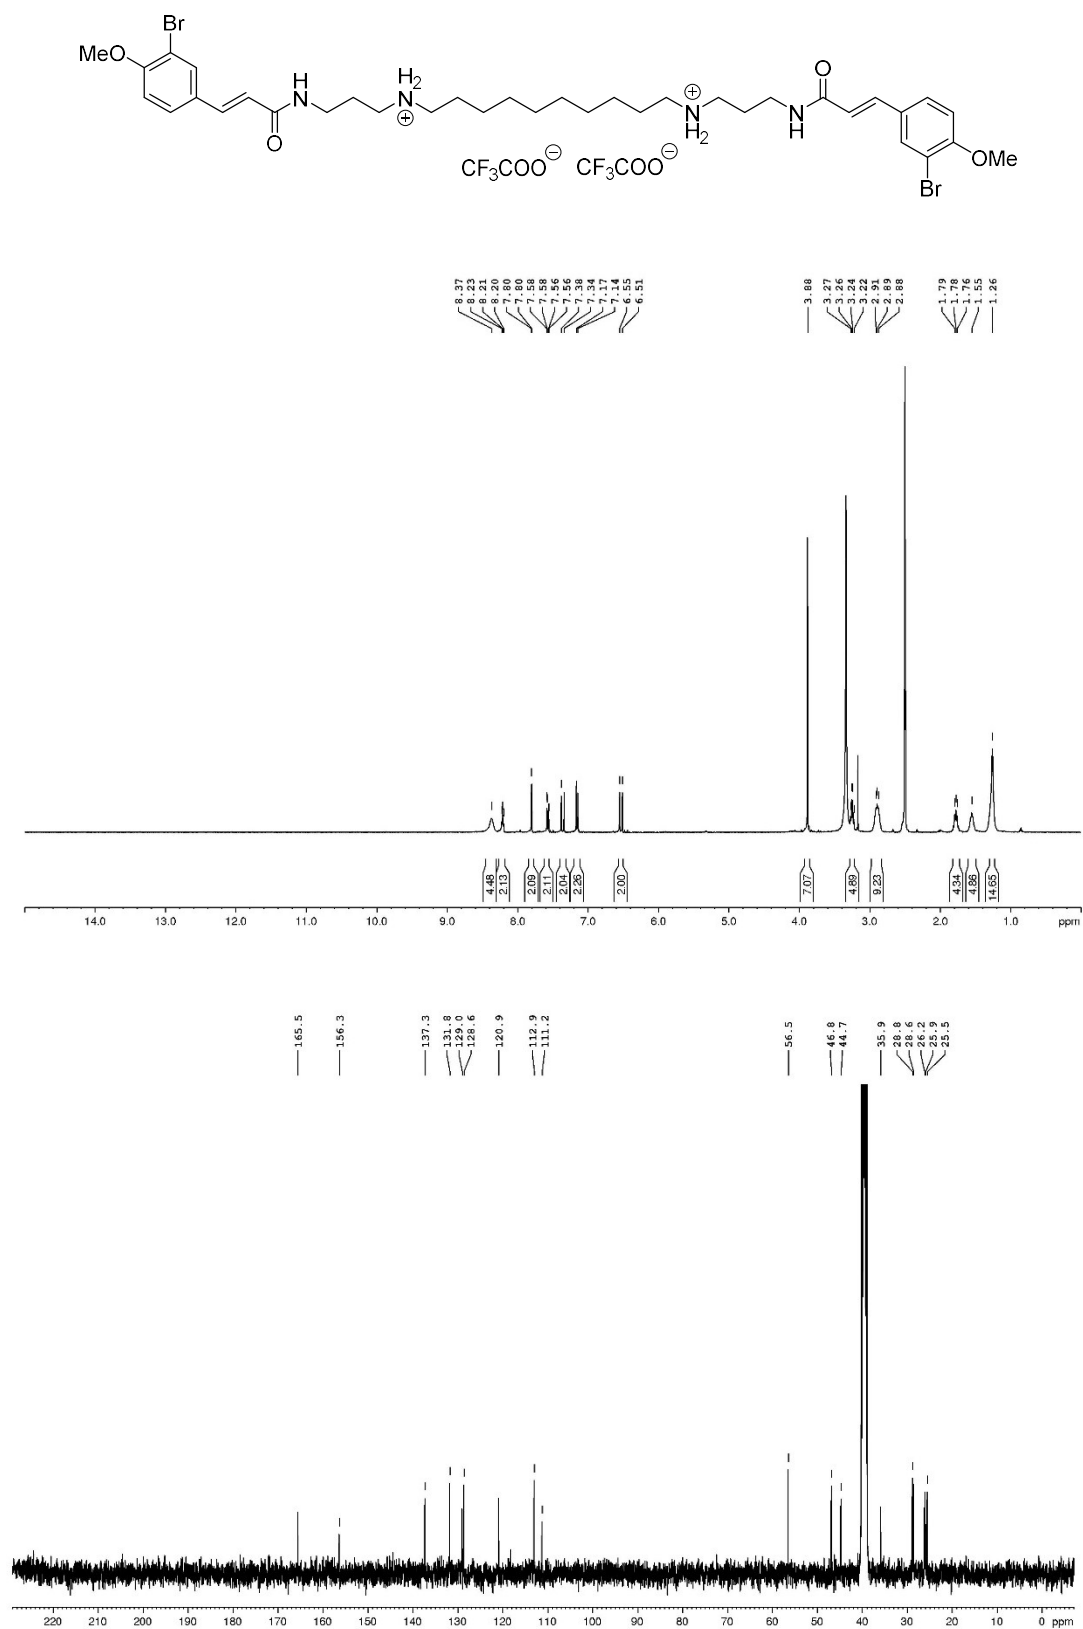

Figure S17.  $^1\text{H}$  (DMSO- $d_6$ , 400 MHz) and  $^{13}\text{C}$  (DMSO- $d_6$ , 100 MHz) NMR spectra for **15e**.

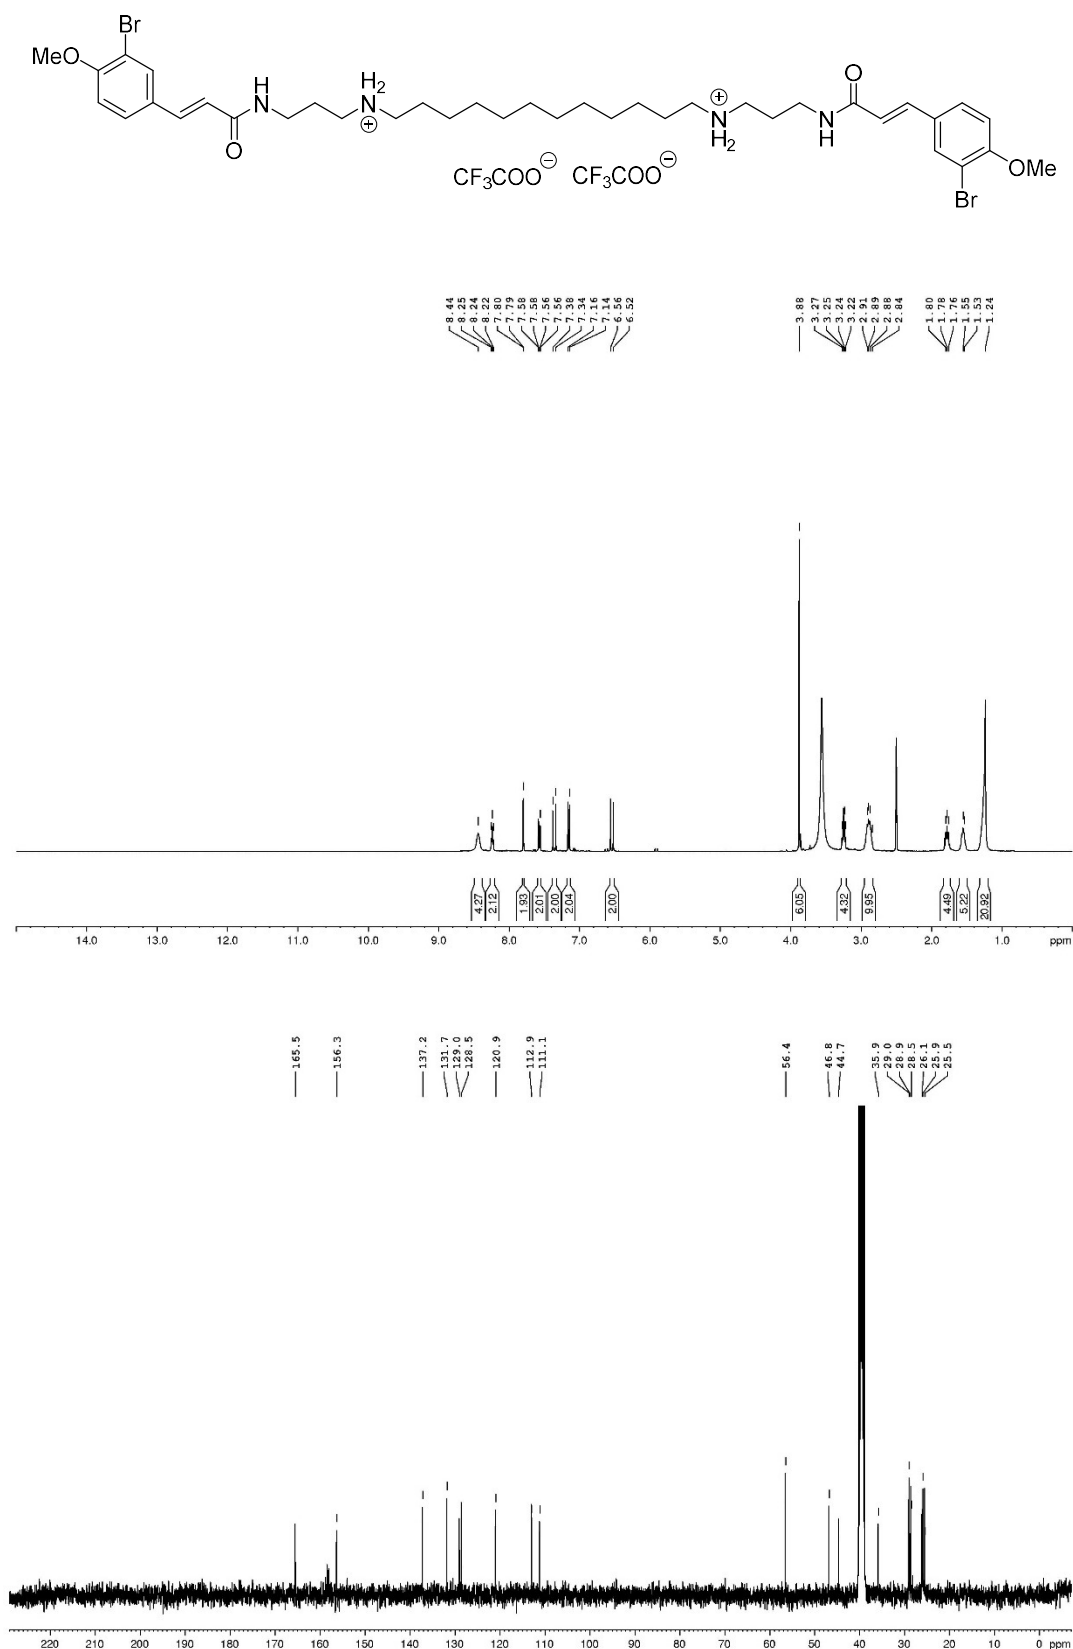

**Figure S18.**  $^1\text{H}$  ( $\text{DMSO-}d_6$ , 400 MHz) and  $^{13}\text{C}$  ( $\text{DMSO-}d_6$ , 100 MHz) NMR spectra for **15f**.

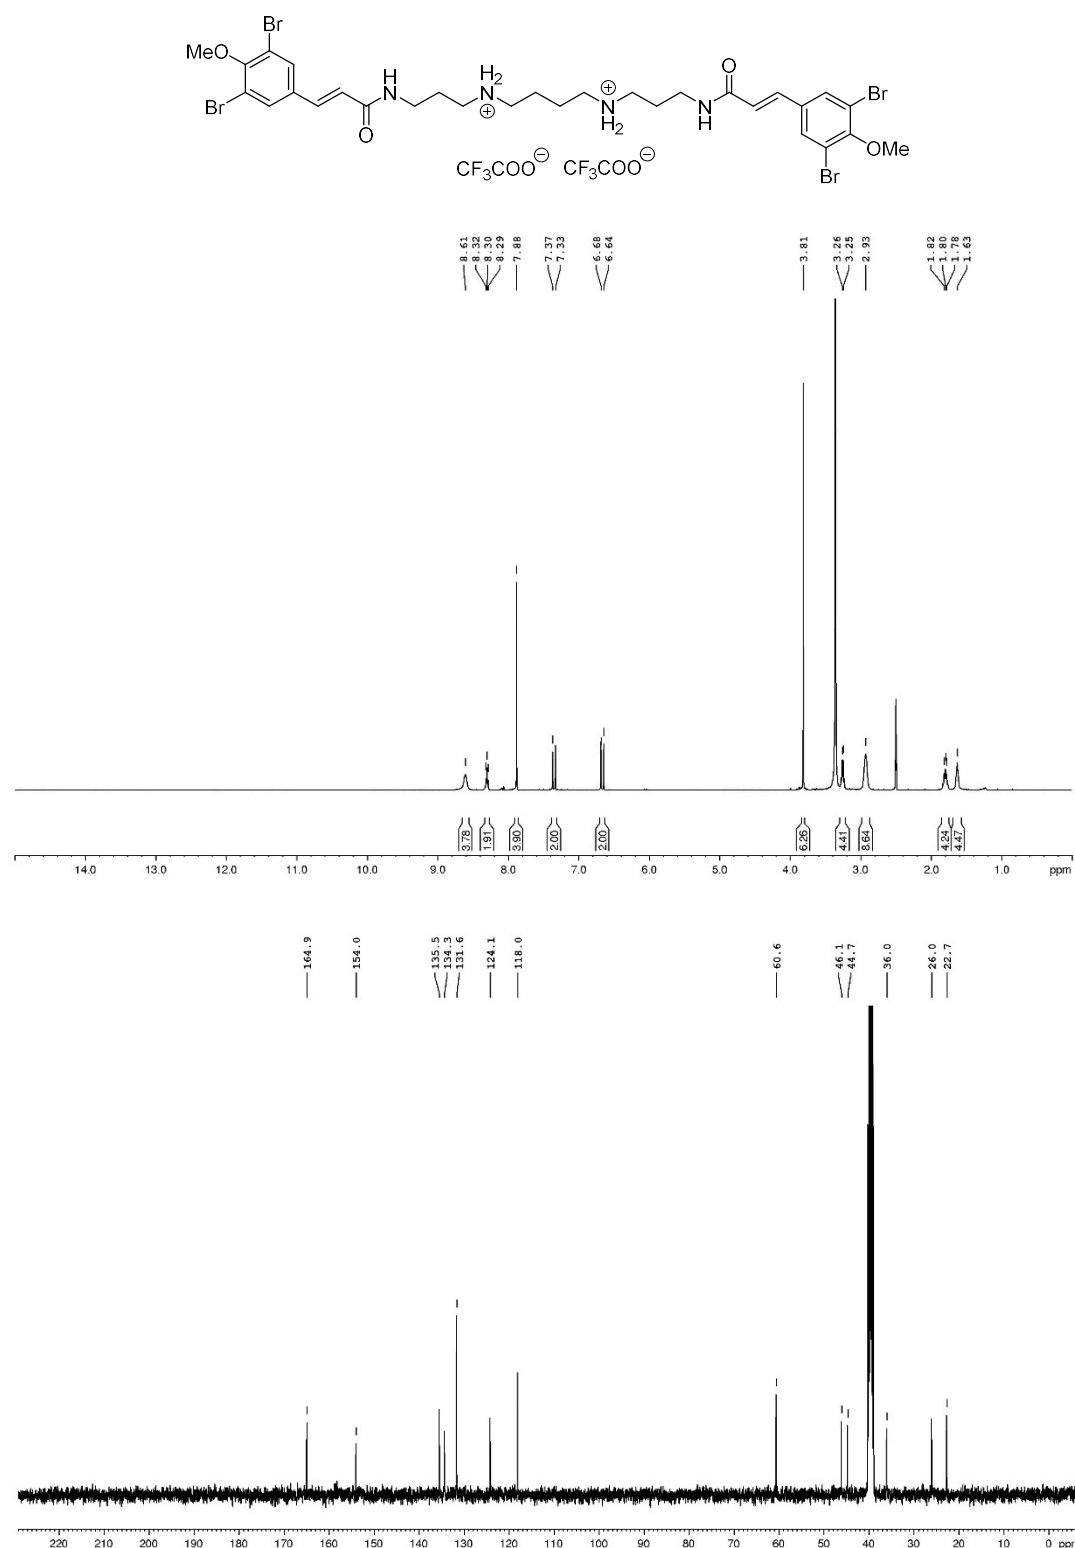

**Figure S19.**  $^1\text{H}$  (DMSO- $d_6$ , 400 MHz) and  $^{13}\text{C}$  (DMSO- $d_6$ , 100 MHz) NMR spectra for **16a**.

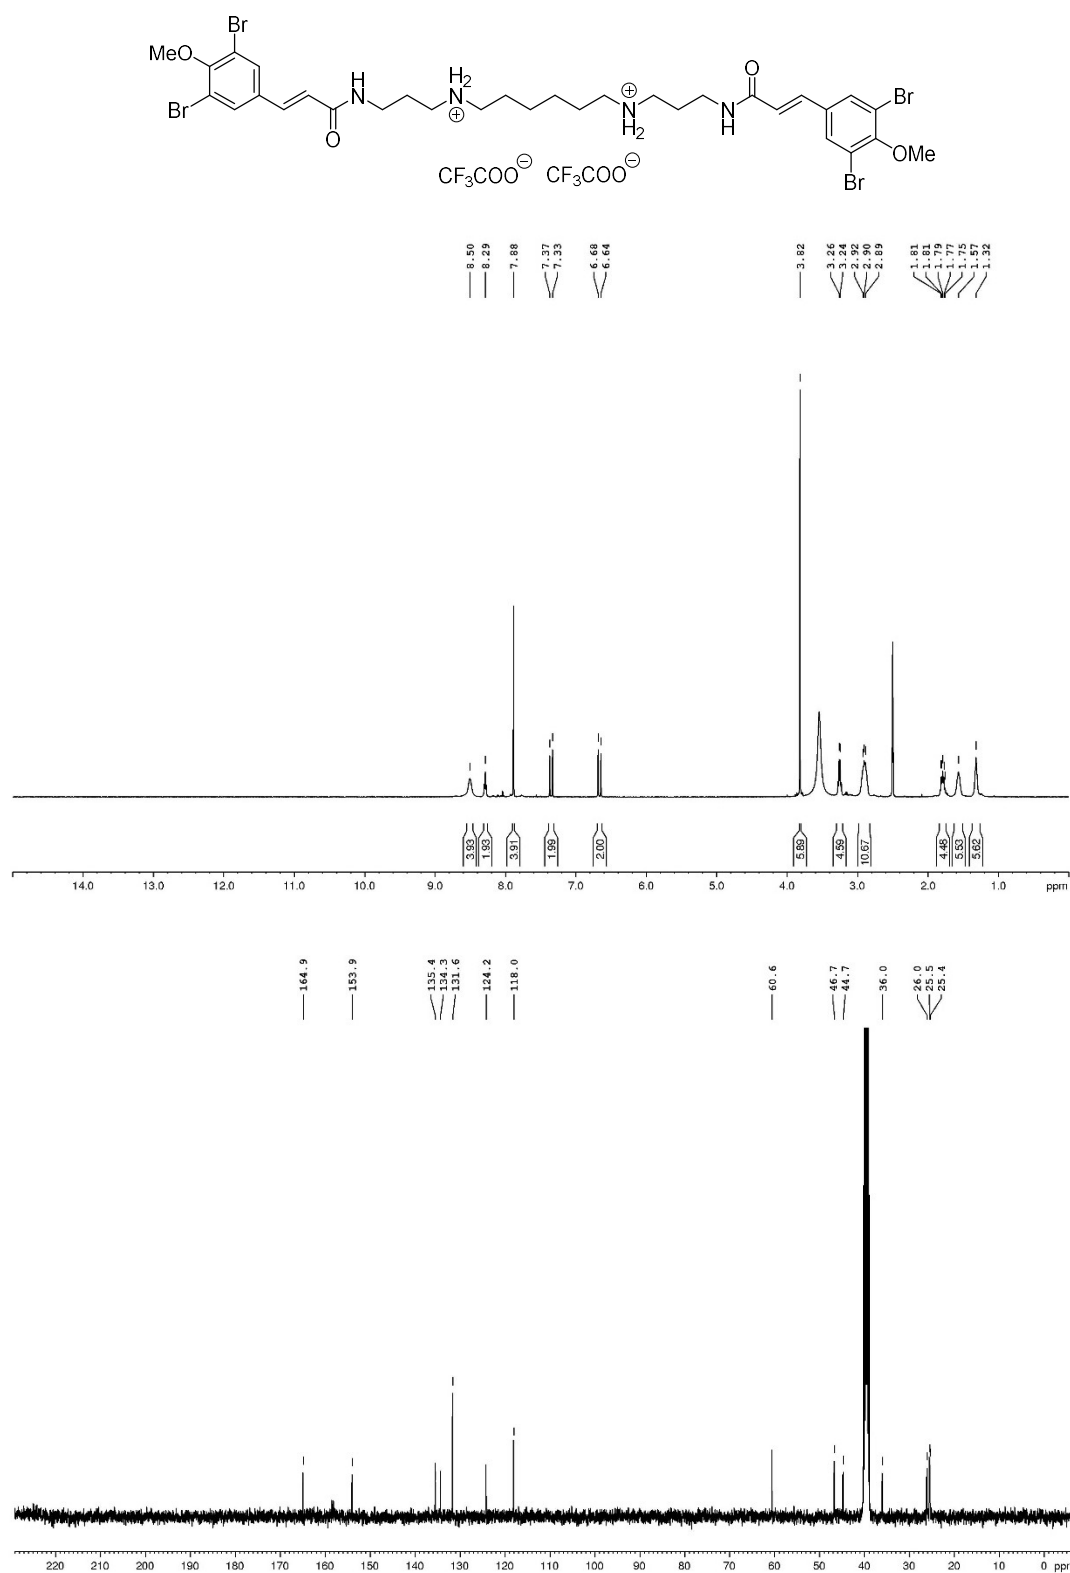

**Figure S20.**  $^1\text{H}$  ( $\text{DMSO}-d_6$ , 400 MHz) and  $^{13}\text{C}$  ( $\text{DMSO}-d_6$ , 100 MHz) NMR spectra for **16b**.

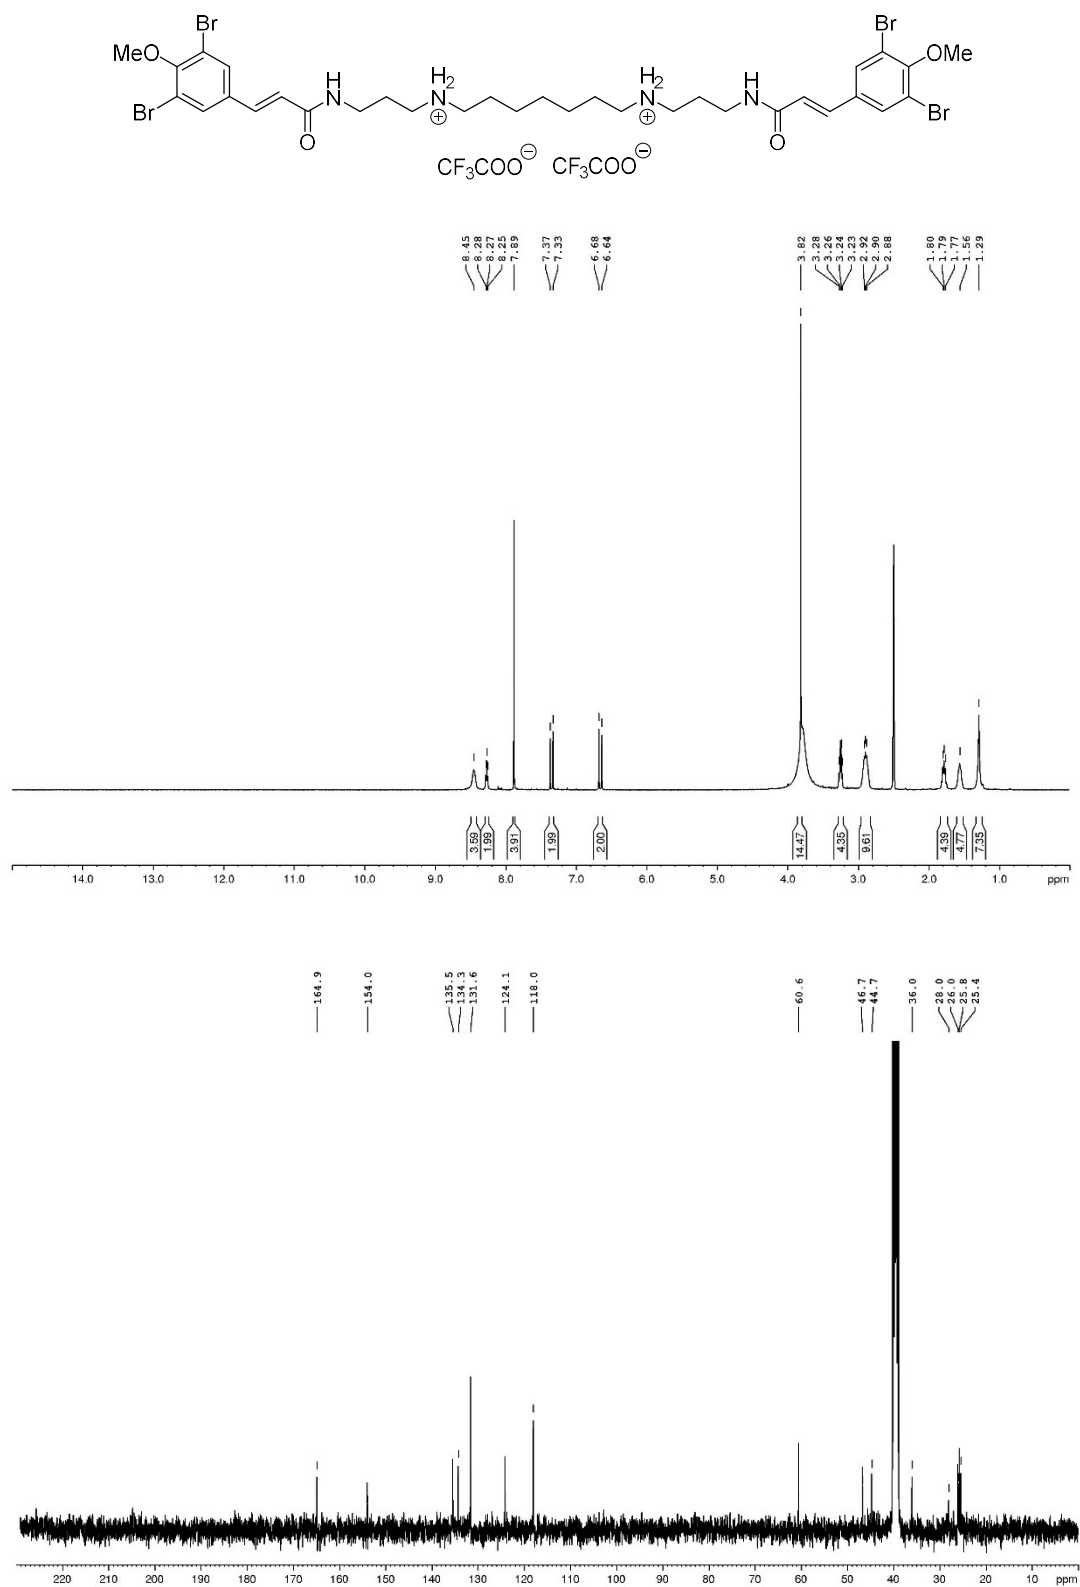

**Figure S21.** <sup>1</sup>H (DMSO-*d*<sub>6</sub>, 400 MHz) and <sup>13</sup>C (DMSO-*d*<sub>6</sub>, 100 MHz) NMR spectra for **16c**.

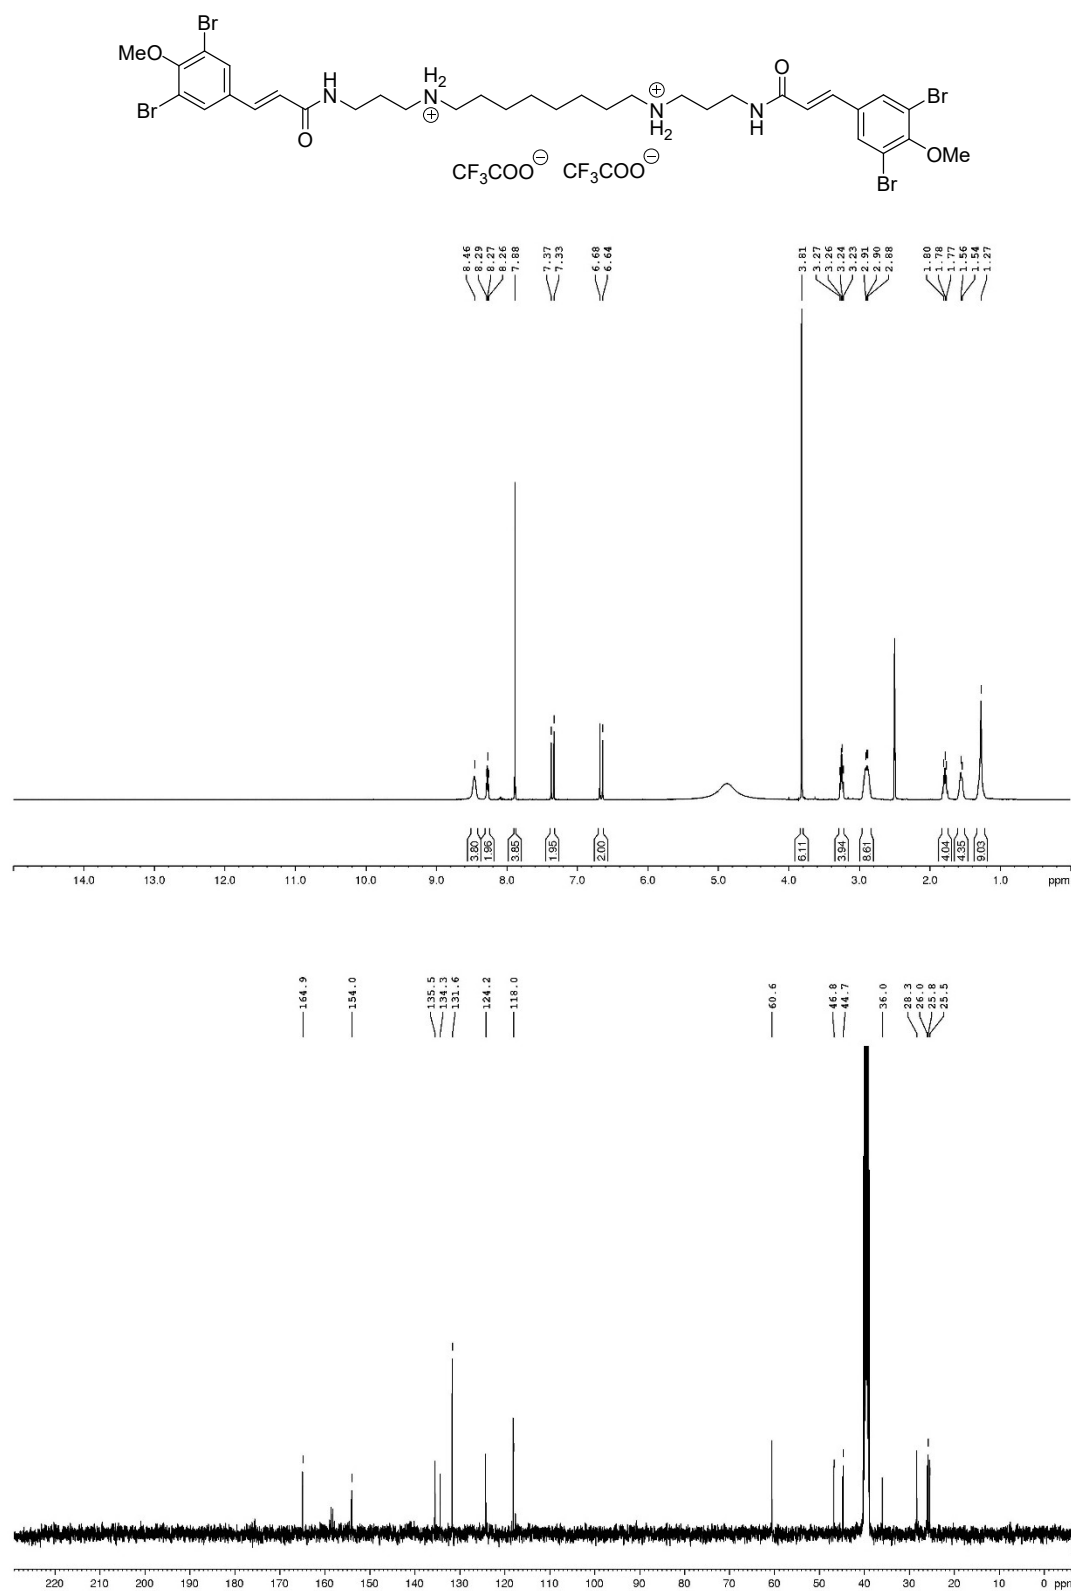

**Figure S22.**  $^1\text{H}$  (DMSO- $d_6$ , 400 MHz) and  $^{13}\text{C}$  (DMSO- $d_6$ , 100 MHz) NMR spectra for **16d**.



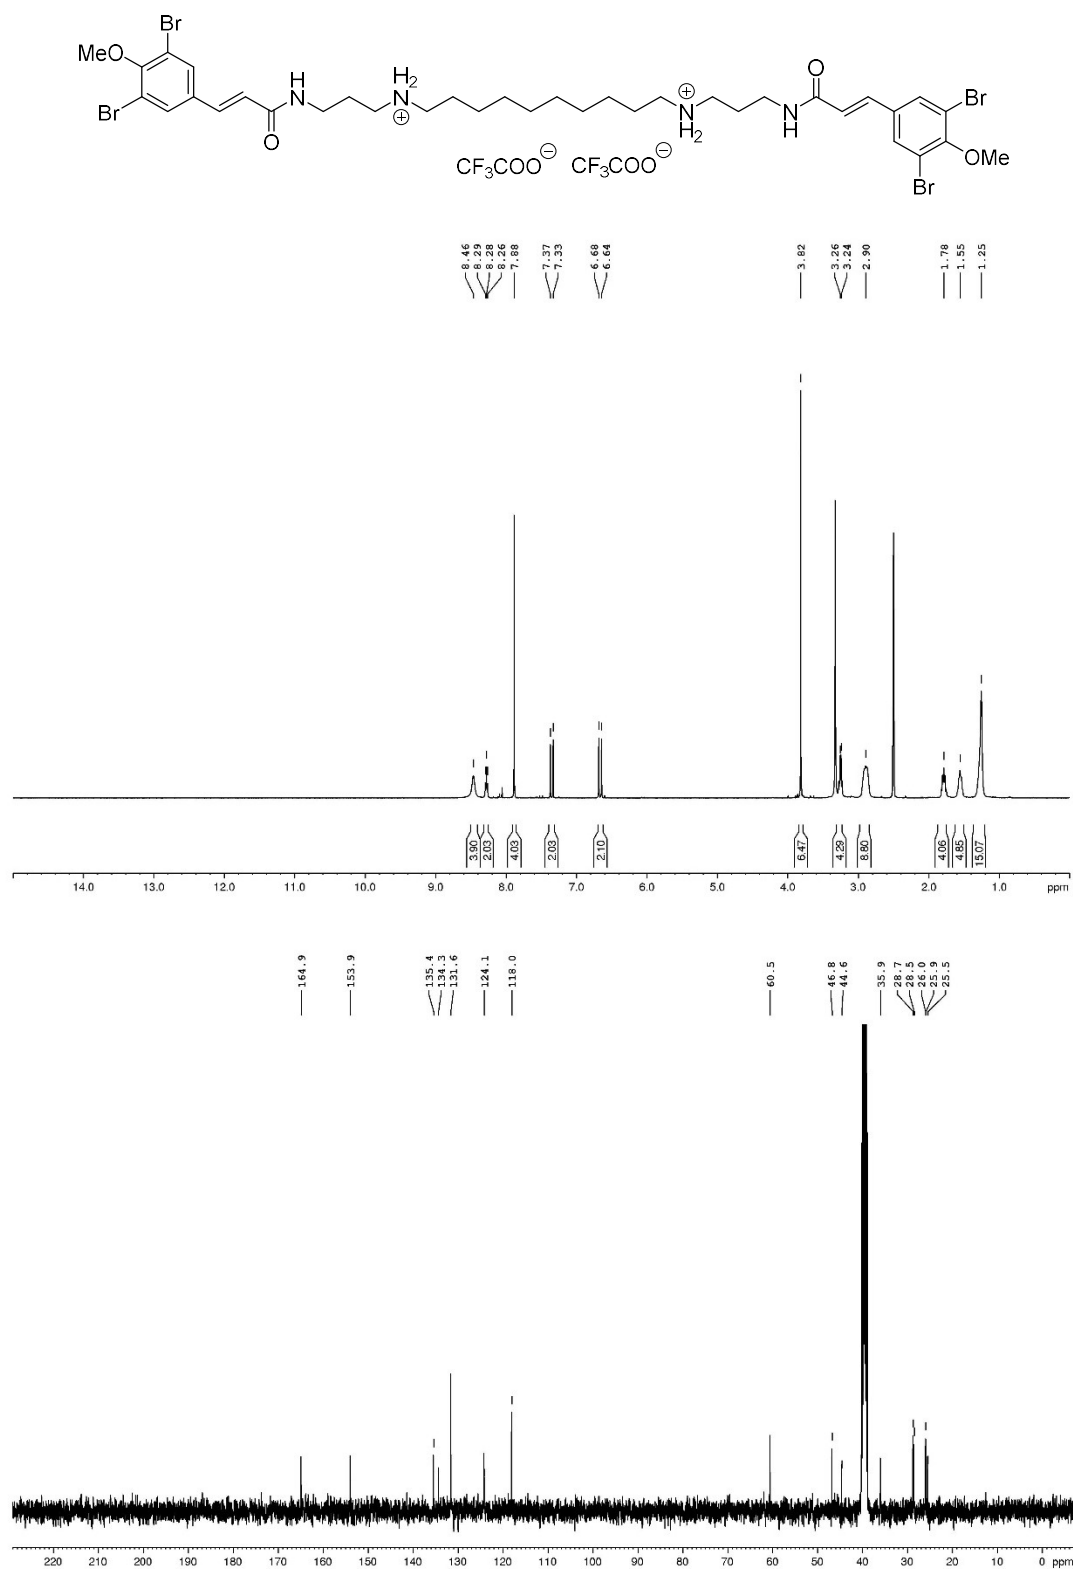

**Figure S23.** <sup>1</sup>H (DMSO-*d*<sub>6</sub>, 400 MHz) and <sup>13</sup>C (DMSO-*d*<sub>6</sub>, 100 MHz) NMR spectra for **16e**.

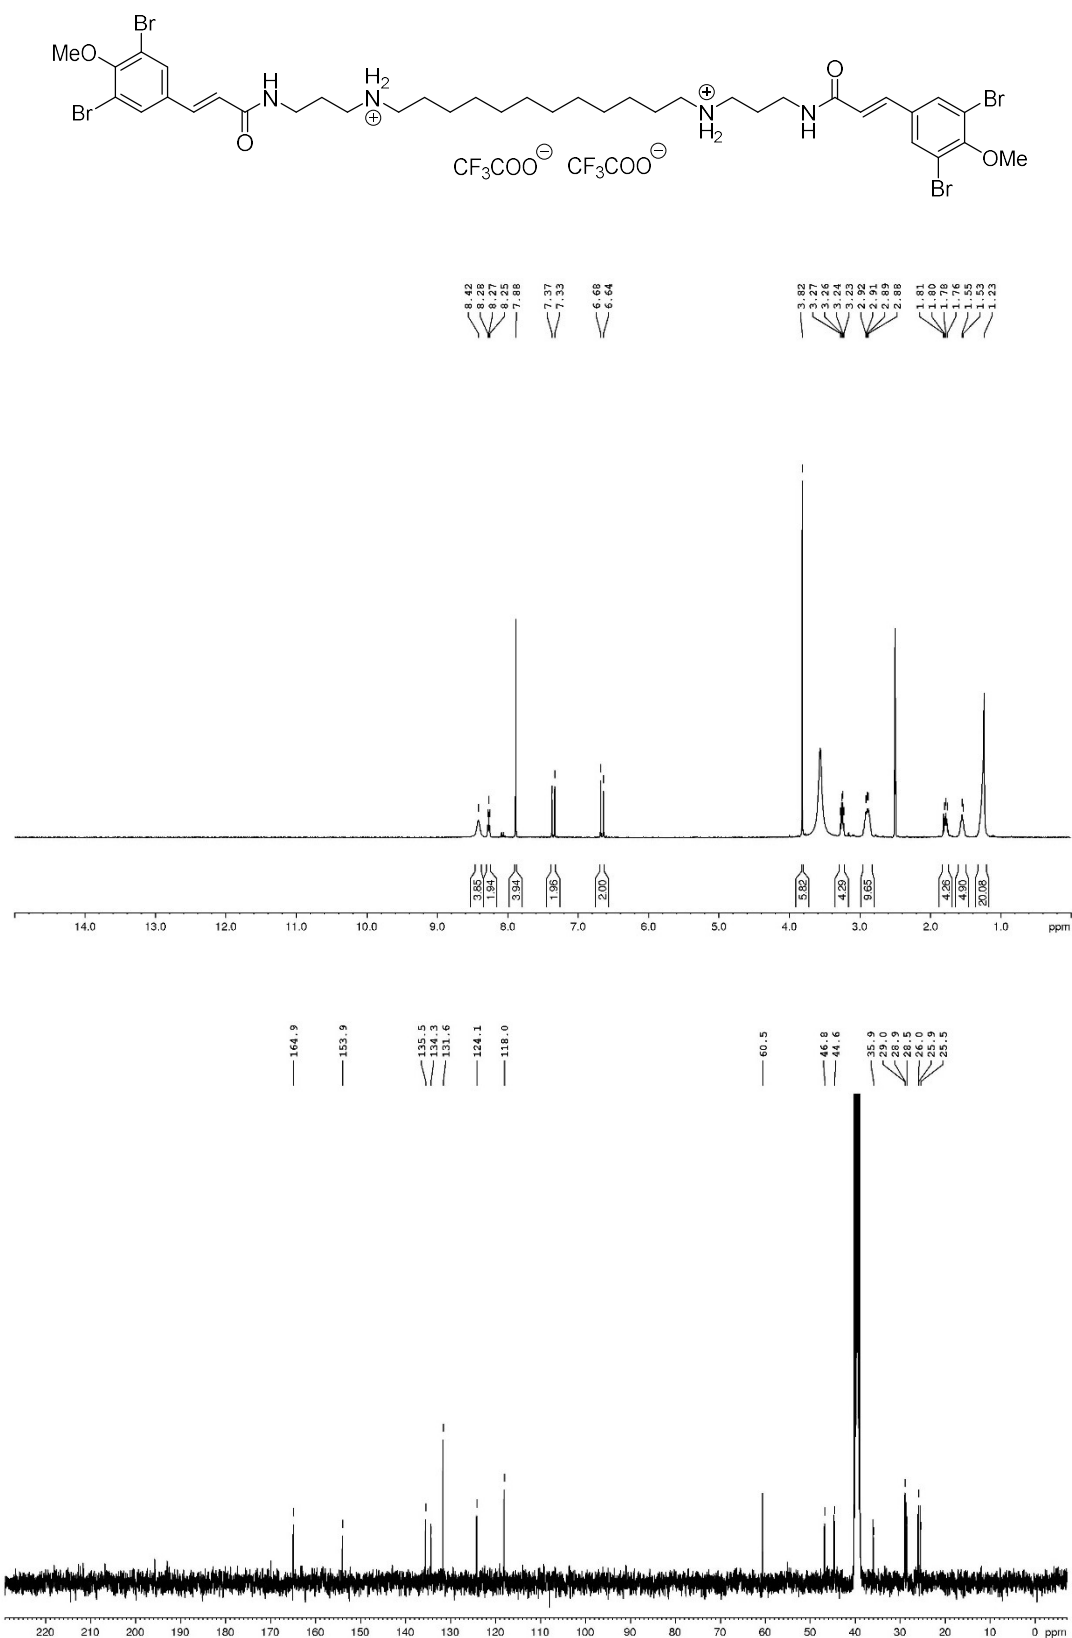

**Figure S24.**  $^1\text{H}$  (DMSO- $d_6$ , 400 MHz) and  $^{13}\text{C}$  (DMSO- $d_6$ , 100 MHz) NMR spectra for **16f**.
